# Supplementary material for: Machine Learning Approaches to Predict 6-Month Mortality Among Patients With Cancer
Source: PubMed Central journal article supplement (PMC6822091; doi:10.1001/jamanetworkopen.2019.15997), 2019-10-25
Supplement: jamanetwopen-2-e1915997-s001.pdf [file jamanetwopen-2-e1915997-s001.pdf]

## Supplementary Online Content

Parikh RB, Manz C, Chivers C, et al. Machine learning approaches to predict 6-month mortality among patients with cancer. *JAMA Netw Open*. 2019;2(10):e1915997.  
doi:10.1001/jamanetworkopen.2019.15997

**eMethods.** Codes, Regression Output, and Model Parameters

**eReferences.**

**eFigure 1.** Cohort Selection Process

**eFigure 2.** Model Calibration Plots

**eFigure 3.** Observed 180-Day Survival by Varying Risk Thresholds for Random Forest Model

**eFigure 4.** Observed 500-Day Survival by Predicted Risk for Random Forest Model

**eTable 1.** Published Electronic Health Record-Based Machine Learning Prognostic Tools

**eTable 2.** Variables Included in Machine Learning Algorithms

**eTable 3.** Performance Characteristics of Gradient Boosting Model Used for Clinician Surveys

**eTable 4.** Distribution of Coded Elixhauser Comorbidities

**eTable 5.** Baseline Laboratory and Electrocardiogram Values

**eTable 6.** Variable Importance by Model, Top 20 Predictors

This supplementary material has been provided by the authors to give readers additional information about their work.

**eMethods.** Codes, Regression Output, and Model Parameters

- I. Regular expression patterns for Elixhauser Comorbidities
- II. Stepwise logistic regression output
- III. Feature selection for all models
- IV. Hyperparameter optimization for gradient boosting and random forest algorithm

## I. Regular expression patterns for Elixhauser Comorbidities

| Comorbidity               | ICD-10 Regular Expression Pattern                                                 | ICD-9 Regular Expression Pattern                                                                 | ICD-10 Codes Observed                                                                                                                                                                                                                                                                                                                                                                               | ICD-9 Codes Observed                                                                                                                                                                                                                                                                                                                                                               |
|---------------------------|-----------------------------------------------------------------------------------|--------------------------------------------------------------------------------------------------|-----------------------------------------------------------------------------------------------------------------------------------------------------------------------------------------------------------------------------------------------------------------------------------------------------------------------------------------------------------------------------------------------------|------------------------------------------------------------------------------------------------------------------------------------------------------------------------------------------------------------------------------------------------------------------------------------------------------------------------------------------------------------------------------------|
| Alcohol abuse             | ['F10', 'E52', 'G621', 'I426', 'K292', 'K70[039]', 'T51', 'Z502', 'Z714', 'Z721'] | ['2652', '291[12356789]', '303[09]', '3050', '3575', '4255', '5353', '571[0123]', '980', 'V113'] | ['F10.10', 'T51.91XD', 'K70.30', 'K70.31', 'F10.21', 'F10.20', 'F10.239', 'T51.0X1A', 'F10.982', 'F10.231', 'K29.21', 'F10.129', 'F10.11', 'F10.99', 'K70.9', 'I42.6', 'F10.19', 'F10.96', 'F10.29', 'F10.288', 'K70.0']                                                                                                                                                                            | ['303.90', '305.00', '305.03', '291.81', '303.91', '303.93', '305.01', '291.2', '571.2', '571.3', 'V11.3', '303.00', '305.02', '425.5', '535.30', '571.1', '357.5', '303.01', '571.0', '980.0', '303.02', '291.89']                                                                                                                                                                |
| Cardiac arrhythmias       | ['I44[123]', 'I456', 'I459', 'I4[789]', 'R00[018]', 'T821', 'Z[49]50']            | ['426[079]]1[023]', '427[01234]', 'V450', 'V533']                                                | ['I47.1', 'I48.0', 'I48.91', 'I48.2', 'I44.2', 'I48.1', 'I49.8', 'I44.1', 'I49.5', 'I49.3', 'I48.92', 'R00.0', 'I49.1', 'R00.1', 'Z95.0', 'I47.2', 'I45.9', 'I45.6', 'I47.9', 'I48.3', 'I49.49', 'I48.4', 'T82.199A', 'T82.190A', 'I49.9', 'I49.01', 'Z45.010', 'I44.30', 'Z45.02', 'R00.8', 'I47.0', 'T82.198A', 'Z45.09', 'Z45.018', 'T82.119A', 'T82.119D', 'T82.110A', 'I44.39']                | ['427.0', '427.31', '427.1', '426.0', '426.13', 'V45.01', 'V45.02', 'V53.31', '426.12', '427.32', '426.9', '427.2', '427.41', '426.7', 'V53.32', '427.42', '426.10', 'V45.09', 'V53.39', 'V45.00']                                                                                                                                                                                 |
| Blood loss anemia         | ['D500']                                                                          | ['2800']                                                                                         | ['D50.0']                                                                                                                                                                                                                                                                                                                                                                                           | ['280.0']                                                                                                                                                                                                                                                                                                                                                                          |
| Congestive heart failure  | ['I099', 'I1(10[3]02)', 'I255', 'I4(2[056789])3', 'I50', 'P290']                  | ['39891', '402(01[11]91)', '404(01[03][19][13])', '42(5[456789])8']                              | ['I50.32', 'I50.33', 'I42.8', 'I42.9', 'I25.5', 'I50.23', 'I50.43', 'I50.30', 'I50.9', 'I50.21', 'I50.22', 'I50.42', 'I50.1', 'I50.31', 'I50.20', 'I50.40', 'I42.0', 'I13.2', 'I42.5', 'I50.41', 'I42.7', 'I43', 'I13.0', 'I50.810', 'I11.0', 'I09.9', 'I42.6']                                                                                                                                     | ['428.32', '428.0', '428.33', '425.4', '404.91', '428.43', '402.91', '428.30', '428.21', '425.9', '428.22', '425.8', '428.23', '402.11', '404.11', '428.1', '428.31', '428.42', '428.40', '425.7', '428.9', '398.91', '428.20', '428.41', '425.5', '404.01', '404.93', '404.03']                                                                                                   |
| Chronic pulmonary disease | ['I27[89]', 'J4[01234567]', 'J6([01234567])84', 'J70[13]']                        | ['416[89]', '49', '50([012345])64[8]18']                                                         | ['J44.9', 'J45.20', 'J43.8', 'J45.909', 'J45.30', 'J40', 'J45.40', 'J45.990', 'J47.1', 'J47.9', 'J67.9', 'J43.9', 'J41.0', 'J43.2', 'J45.50', 'J44.1', 'J45.21', 'J43.1', 'J45.901', 'J41.1', 'J42', 'J45.991', 'J44.0', 'J45.31', 'I27.9', 'J45.41', 'J45.51', 'I27.82', 'J70.1', 'I27.81', 'J43.0', 'J45.998', 'J41.8', 'J47.0', 'I27.89', 'J61', 'J45.22', 'J45.42', 'J63.2', 'J70.3', 'J45.32'] | ['416.9', '492.8', '496', '491.8', '416.8', '490', '493.90', '493.10', '493.92', '493.20', '493.22', '494.0', '508.1', '501', '493.81', '493.00', '492.0', '494.1', '491.0', '491.21', '491.20', '491.1', '491.9', '493.82', '493.02', '495.9', '493', '493.01', '493.9', '493.91', '493.21', '491.22', '500', '493.12', '495.8', '508.8', '505', '502', '503', '493.11', '495.2'] |
| Coagulopathy              | ['D6[5678]', 'D69[13456]']                                                        | ['286', '2871', '287[345]']                                                                      | ['D69.3', 'D69.6', 'D68.0', 'D68.8', 'D69.59', 'D68.4', 'D68.1', 'D68.61', 'D68.59', 'D68.51', 'D68.62', 'D67', 'D69.49', 'D68.9', 'D69.1', 'D68.69', 'D65', 'D68.2', 'D68.52', 'D69.41', 'D66', 'D68.311', 'D68.32']                                                                                                                                                                               | ['287.5', '287.31', '286.9', '286.4', '287.30', '287.49', '287.4', '286.2', '287.1', '287.3', '286.3', '286.1', '286.7', '286.6', '286.5', '287.32', '287.39', '286.0', '287.33', '286.59', '287.41', '286.53', '286.52']                                                                                                                                                          |
| Deficiency anemia         | ['D50[89]', 'D5[123]']                                                            | ['280[123456789]', '281']                                                                        | ['D50.9', 'D50.8', 'D51.9', 'D51.0', 'D51.3', 'D51.8', 'D53.1', 'D53.9', 'D53.8', 'D53.2', 'D51.1', 'D53.0', 'D52.8', 'D52.9']                                                                                                                                                                                                                                                                      | ['280.9', '281.9', '281.1', '281.0', '280.8', '280.1', '281.3', '281.2']                                                                                                                                                                                                                                                                                                           |

|                                 |                                                   |                                          |                                                                                                                                                                                                                                                                                                                                                                                                                                                                                                                                                                                                                                                                                                                                                                               |                                                                                                                                                                                                                                                                                                                                                                                                                                                                                                                              |
|---------------------------------|---------------------------------------------------|------------------------------------------|-------------------------------------------------------------------------------------------------------------------------------------------------------------------------------------------------------------------------------------------------------------------------------------------------------------------------------------------------------------------------------------------------------------------------------------------------------------------------------------------------------------------------------------------------------------------------------------------------------------------------------------------------------------------------------------------------------------------------------------------------------------------------------|------------------------------------------------------------------------------------------------------------------------------------------------------------------------------------------------------------------------------------------------------------------------------------------------------------------------------------------------------------------------------------------------------------------------------------------------------------------------------------------------------------------------------|
| Depression                      | ['F204', 'F31[345]', 'F3[23]', 'F341', 'F4[13]2'] | ['296[235]', '3004', '309', '311']       | ['F32.9', 'F33.1', 'F33.41', 'F33.2', 'F43.23', 'F32.4', 'F32.1', 'F33.0', 'F34.1', 'F43.20', 'F32.3', 'F32.0', 'F32.5', 'F33.3', 'F31.30', 'F43.22', 'F43.21', 'F32.8', 'F32.2', 'F33.42', 'F33.40', 'F31.4', 'F43.29', 'F33.9', 'F31.32', 'F31.5', 'F43.24']                                                                                                                                                                                                                                                                                                                                                                                                                                                                                                                | ['311', '309.28', '300.4', '296.20', '296.32', '309.9', '309.0', '309.81', '296.30', '296.25', '296.31', '296.35', '296.36', '296.33', '296.22', '296.24', '296.23', '309.24', '309.83', '296.34', '296.55', '309.29', '296.21', '296.26', '309.1', '296.53', '296.50', '296.51', '296.52', '309.89', '296.56', '309.4', '296.54']                                                                                                                                                                                           |
| Diabetes complicated            | ['E1[01234][2345678]']                            | ['250[456789]']                          | ['E11.65', 'E11.329', 'E11.29', 'E11.22', 'E11.319', 'E11.8', 'E11.40', 'E11.69', 'E11.649', 'E11.21', 'E11.49', 'E10.29', 'E10.8', 'E11.359', 'E13.21', 'E11.621', 'E10.65', 'E11.3299', 'E10.649', 'E11.42', 'E13.40', 'E11.59', 'E11.39', 'E11.3599', 'E10.359', 'E11.311', 'E11.610', 'E11.622', 'E13.42', 'E10.319', 'E10.22', 'E11.43', 'E11.339', 'E11.618', 'E10.329', 'E10.3299', 'E13.65', 'E13.8', 'E11.351', 'E13.339', 'E11.321', 'E11.349', 'E11.3499', 'E11.628', 'E10.21', 'E10.42', 'E10.618', 'E11.52', 'E13.29', 'E10.43', 'E10.40', 'E11.41', 'E13.359', 'E10.36', 'E11.51', 'E11.341', 'E11.3419', 'E11.331', 'E11.3319', 'E13.3599', 'E13.311', 'E11.36', 'E13.51', 'E13.319', 'E10.49', 'E13.329', 'E13.628', 'E13.43', 'E13.621', 'E10.59', 'E11.44'] | ['250.40', '250.50', '250.60', '250.80', '250.41', '250.51', '250.42', '250.62', '250.82', '250.81', '250.92', '250.90', '250.52', '250.61', '250.83', '250.70', '250.9', '250.93', '250.71', '250.43', '250.72', '250.53', '250.63', '250.73']                                                                                                                                                                                                                                                                              |
| Diabetes uncomplicated          | ['E1[01234][019]']                                | ['250[0123]']                            | ['E11.9', 'E13.10', 'E13.9', 'E10.9', 'E11.00', 'E11.01', 'E10.10', 'E13.11']                                                                                                                                                                                                                                                                                                                                                                                                                                                                                                                                                                                                                                                                                                 | ['250.00', '250.02', '250.10', '250.12', '250.01', '250.13', '250.03', '250.20', '250.11', '250.32', '250.22', '250.0', '250.1', '250.30']                                                                                                                                                                                                                                                                                                                                                                                   |
| Drug abuse                      | ['F1[12345689]', 'Z715', 'Z722']                  | ['292', '304', '305[23456789]', 'V6542'] | ['F11.90', 'F11.23', 'F14.10', 'F12.10', 'F11.10', 'F19.90', 'F14.21', 'F19.188', 'F11.921', 'F19.20', 'F13.239', 'F11.20', 'F19.239', 'F13.20', 'F19.10', 'F12.20', 'F12.90', 'F11.220', 'F15.10', 'F19.21', 'Z71.51', 'F14.20', 'F14.129', 'F19.94', 'F19.982', 'F15.20', 'F19.950', 'F11.29', 'F19.129', 'F13.10', 'F15.982', 'F14.90', 'F11.11', 'F11.21', 'F13.231', 'F13.121', 'F15.23', 'F13.90', 'F11.24']                                                                                                                                                                                                                                                                                                                                                            | ['305.60', '304.01', '305.20', '292.84', '292.81', '305.50', '305.62', '304.91', '304.20', '304.90', '304.00', '292.0', '305.63', 'V65.42', '305.93', '305.53', '304.03', '305.61', '305.90', '305.51', '304.23', '304.30', '305.40', '292.12', '305.23', '304.21', '305.71', '305.21', '292.9', '304.40', '304.13', '304.10', '304.61', '305.92', '305.91', '304.11', '292.89', '305.41', '305.73', '305.33', '304.31', '292.85', '305.22', '292.11', '304.93', '304.33', '305.43', '304.71', '305.52', '304.83', '305.70'] |
| Fluid and electrolyte disorders | ['E222', 'E8[67]']                                | ['2536', '276']                          | ['E87.1', 'E87.0', 'E87.2', 'E87.6', 'E87.5', 'E86.0', 'E87.3', 'E22.2', 'E87.4', 'E87.70', 'E87.8', 'E86.1', 'E87.79', 'E87.71', 'E86.9']                                                                                                                                                                                                                                                                                                                                                                                                                                                                                                                                                                                                                                    | ['276.51', '276.7', '276.1', '276.52', '253.6', '276.8', '276.2', '276.3', '276.69', '276.50', '276.0', '276.61', '276.4', '276.5', '276.9', '276.6']                                                                                                                                                                                                                                                                                                                                                                        |
| AIDS/HIV                        | ['B2[0124]']                                      | ['04[234]']                              | ['B20']                                                                                                                                                                                                                                                                                                                                                                                                                                                                                                                                                                                                                                                                                                                                                                       | ['042']                                                                                                                                                                                                                                                                                                                                                                                                                                                                                                                      |

|                             |                                                                         |                                                                      |                                                                                                                                                                                                                                                                                                                                                                                                                                                                                                                                                                                                                                                                                                                                                                                                                                                                                                                                                                                                                                                                                                                                                                                                    |                                                                                                                                                                                                                                                                                                                                                                                                                                                                                                                                                                                                                                                                                                                                                                                                                                                                                                                                                                                                                                                                                                                                                                                               |
|-----------------------------|-------------------------------------------------------------------------|----------------------------------------------------------------------|----------------------------------------------------------------------------------------------------------------------------------------------------------------------------------------------------------------------------------------------------------------------------------------------------------------------------------------------------------------------------------------------------------------------------------------------------------------------------------------------------------------------------------------------------------------------------------------------------------------------------------------------------------------------------------------------------------------------------------------------------------------------------------------------------------------------------------------------------------------------------------------------------------------------------------------------------------------------------------------------------------------------------------------------------------------------------------------------------------------------------------------------------------------------------------------------------|-----------------------------------------------------------------------------------------------------------------------------------------------------------------------------------------------------------------------------------------------------------------------------------------------------------------------------------------------------------------------------------------------------------------------------------------------------------------------------------------------------------------------------------------------------------------------------------------------------------------------------------------------------------------------------------------------------------------------------------------------------------------------------------------------------------------------------------------------------------------------------------------------------------------------------------------------------------------------------------------------------------------------------------------------------------------------------------------------------------------------------------------------------------------------------------------------|
| Hypertension, complicated   | ['I1[1235]']                                                            | ['40[2345]']                                                         | ['I12.9', 'I11.9', 'I12.0', 'I15.0', 'I15.1', 'I15.8', 'I15.9', 'I13.2', 'I13.0', 'I13.10', 'I11.0', 'I15.2']                                                                                                                                                                                                                                                                                                                                                                                                                                                                                                                                                                                                                                                                                                                                                                                                                                                                                                                                                                                                                                                                                      | ['403.90', '402.90', '403.10', '404.90', '403.00', '404.91', '402.91', '403.11', '403.91', '402.11', '404.11', '402.10', '404.00', '405.19', '404.01', '405.01', '404.93', '404.10', '403.01', '405.99', '405.91', '404.03', '404.12', '402.00', '405.11', '404.92']                                                                                                                                                                                                                                                                                                                                                                                                                                                                                                                                                                                                                                                                                                                                                                                                                                                                                                                          |
| Hypertension, uncomplicated | ['I10']                                                                 | ['401']                                                              | ['I10']                                                                                                                                                                                                                                                                                                                                                                                                                                                                                                                                                                                                                                                                                                                                                                                                                                                                                                                                                                                                                                                                                                                                                                                            | ['401.1', '401.9', '401.0', '401']                                                                                                                                                                                                                                                                                                                                                                                                                                                                                                                                                                                                                                                                                                                                                                                                                                                                                                                                                                                                                                                                                                                                                            |
| Hypothyroidism              | ['E0[0123]', 'E890']                                                    | ['2409', '24([34][6[18]')']                                          | ['E03.9', 'E02', 'E03.8', 'E03.2', 'E89.0', 'E03.4', 'E01.0', 'E03.3', 'E03.1', 'E01.2']                                                                                                                                                                                                                                                                                                                                                                                                                                                                                                                                                                                                                                                                                                                                                                                                                                                                                                                                                                                                                                                                                                           | ['244.9', '240.9', '244.8', '246.8', '244.0', '244.1', '244.3', '246.1', '243', '244.2']                                                                                                                                                                                                                                                                                                                                                                                                                                                                                                                                                                                                                                                                                                                                                                                                                                                                                                                                                                                                                                                                                                      |
| Liver disease               | ['B18', 'I8(5[64]', 'I982', 'K7(0[1[13457][234][6[023456789]'], 'Z944'] | ['070([23][45]'), '456[012]', '57([01][2[2345678][3[3489]'], 'V427'] | ['B18.2', 'K76.0', 'K74.60', 'K74.69', 'K76.9', 'K76.89', 'I85.10', 'K76.6', 'Z94.4', 'K70.30', 'B18.1', 'I85.00', 'K70.31', 'K73.9', 'K72.90', 'K74.0', 'K71.7', 'K72.00', 'K73.2', 'K70.9', 'B18.9', 'K70.10', 'I86.4', 'K74.3', 'K74.5', 'I85.01', 'I85.11', 'K76.7', 'K76.4', 'K71.10', 'B18.8', 'K76.5', 'K74.4', 'K76.3', 'K72.10', 'K70.40', 'K70.0', 'K70.11']                                                                                                                                                                                                                                                                                                                                                                                                                                                                                                                                                                                                                                                                                                                                                                                                                             | ['573.3', '573.8', '573.9', '571.8', '456.1', '571.5', '070.54', '070.51', '571.41', '570', '070.30', '571.2', '571.3', '571.9', '572.3', '070.32', 'V42.7', '571.6', '571.49', '456.0', '456.20', '456.21', '573.4', '572.2', '070.2', '572.8', '070.44', '571.40', '571.42', '571.1', '571.0', '070.23', '070.33', '571.4', '070.59', '572.4', '571', '070.20']                                                                                                                                                                                                                                                                                                                                                                                                                                                                                                                                                                                                                                                                                                                                                                                                                             |
| Lymphoma                    | ['C8[123458]', 'C96', 'C90[02]']                                        | ['20[012]', '2030', '2386']                                          | ['C83.00', 'C90.00', 'C83.80', 'C88.0', 'C85.99', 'C85.90', 'C85.10', 'C85.92', 'C82.90', 'C83.30', 'C85.80', 'C83.10', 'C81.00', 'C90.01', 'C84.70', 'C84.09', 'C84.69', 'C85.98', 'C83.31', 'C88.4', 'C85.93', 'C81.03', 'C85.83', 'C85.81', 'C85.89', 'C85.91', 'C83.01', 'C96.2', 'C81.90', 'C83.13', 'C81.98', 'C85.85', 'C84.00', 'C84.A0', 'C84.A8', 'C81.11', 'C82.41', 'C82.40', 'C90.02', 'C81.18', 'C82.20', 'C81.79', 'C81.71', 'C81.72', 'C81.12', 'C81.92', 'C90.20', 'C82.18', 'C82.94', 'C85.88', 'C83.98', 'C81.93', 'C81.40', 'C82.13', 'C90.21', 'C85.19', 'C85.82', 'C84.44', 'C82.38', 'C84.19', 'C81.15', 'C82.00', 'C85.94', 'C83.35', 'C82.97', 'C83.19', 'C85.97', 'C82.98', 'C84.49', 'C84.48', 'C85.87', 'C83.59', 'C85.16', 'C85.86', 'C83.39', 'C85.95', 'C83.32', 'C81.20', 'C81.19', 'C83.78', 'C83.79', 'C96.A', 'C83.34', 'C84.10', 'C82.91', 'C82.01', 'C82.16', 'C81.10', 'C81.99', 'C96.9', 'C85.13', 'C85.15', 'C82.10', 'C83.38', 'C85.18', 'C83.33', 'C83.37', 'C82.30', 'C81.94', 'C83.82', 'C82.11', 'C82.08', 'C83.50', 'C84.40', 'C83.51', 'C82.80', 'C81.01', 'C83.70', 'C83.73', 'C83.75', 'C81.91', 'C96.6', 'C83.08', 'C83.18', 'C81.74', 'C83.86', | ['200.10', '202.80', '203.00', '200.80', '200.4', '200.40', '200.20', '200.30', '203.01', '238.6', '202.83', '202.03', '202.00', '202.88', '202.01', '200.31', '201.90', '200.70', '201.40', '200.60', '202.10', '200.7', '202.8', '202.81', '200.50', '200.51', '202.77', '200.3', '203.02', '202.60', '202.68', '202.05', '202.08', '200.11', '201.9', '201.91', '201.96', '203.0', '202.20', '200.71', '201.92', '201.98', '201.65', '202.85', '202.82', '202.87', '202.04', '200.77', '202.92', '202.84', '202.0', '201.93', '201.95', '201.50', '201.52', '200.33', '202.90', '200.00', '200.41', '202.40', '202.48', '200.76', '200.26', '200.75', '202.02', '200.34', '200.32', '200.62', '202.78', '202.86', '202.70', '200.01', '200.37', '200.48', '200.43', '200.73', '200.14', '202.07', '200.78', '200.08', '202.15', '201.60', '202.7', '200.13', '200.24', '200.28', '202.41', '201.68', '201.58', '202.13', '202.93', '202.06', '202.11', '201.10', '200.38', '200.1', '202.43', '200.61', '201.94', '201.20', '202.12', '202.18', '200.12', '202.50', '201.51', '200.42', '202.74', '200.74', '200.5', '200.88', '202.28', '200.72', '202.73', '200.21', '200.23', '200.44', |

|                              |                                                                                                |                                                                           |                                                                                                                                                                                                                                                                                                                                                                                                                                                                                                                                                                                                                                                                                                                                                                                               |                                                                                                                                                                                                                                                                                                                                                                                                                                                                                                                      |
|------------------------------|------------------------------------------------------------------------------------------------|---------------------------------------------------------------------------|-----------------------------------------------------------------------------------------------------------------------------------------------------------------------------------------------------------------------------------------------------------------------------------------------------------------------------------------------------------------------------------------------------------------------------------------------------------------------------------------------------------------------------------------------------------------------------------------------------------------------------------------------------------------------------------------------------------------------------------------------------------------------------------------------|----------------------------------------------------------------------------------------------------------------------------------------------------------------------------------------------------------------------------------------------------------------------------------------------------------------------------------------------------------------------------------------------------------------------------------------------------------------------------------------------------------------------|
|                              |                                                                                                |                                                                           | 'C82.81', 'C81.78', 'C82.26', 'C85.84', 'C85.12', 'C85.21', 'C85.20', 'C83.74', 'C96.Z', 'C83.09', 'C82.89', 'C82.09', 'C84.18', 'C82.95', 'C84.73', 'C84.72', 'C84.78', 'C83.07', 'C84.Z0', 'C82.61', 'C83.36', 'C83.89', 'C82.04', 'C84.41', 'C96.0', 'C85.26', 'C83.17', 'C81.13', 'C85.96', 'C85.22', 'C82.50', 'C82.06', 'C81.73', 'C82.99', 'C81.75', 'C82.23', 'C85.17', 'C83.15', 'C83.12', 'C81.70', 'C82.35', 'C82.93', 'C88.8', 'C81.08', 'C83.11', 'C82.60', 'C82.02', 'C85.11', 'C84.A9', 'C84.A4', 'C84.A6', 'C84.68', 'C84.60', 'C84.A1', 'C82.68', 'C84.45', 'C81.43', 'C84.43', 'C82.05', 'C82.69', 'C82.21', 'C83.58', 'C96.5', 'C83.76', 'C84.Z9', 'C84.42', 'C84.47', 'C84.07', 'C82.03', 'C83.71', 'C84.79', 'C85.28', 'C85.29', 'C85.14', 'C83.83', 'C84.A2', 'C82.84'] | '200.47', '200.86', '200.35', '202.95', '202.47', '200.45', '202.30', '202.14', '200.63', '200.68', '202', '201.44', '202.4', '202.97', '202.58', '200.58', '201.61', '202.71', '200.46', '201.53', '201.64', '200.18', '202.98', '200.27', '200.36', '200.22', '201.02', '201.48', '200.2', '201.66', '202.36', '202.38', '201', '201.00', '202.96', '200.66', '200.65', '202.17', '202.75', '201.43', '201.97', '202.1', '202.31', '202.24', '201.54', '200.05', '202.91', '200.02', '201.05', '200.15', '200.64'] |
| Metastatic cancer            | ['C7[789]', 'C80']                                                                             | ['19[6789]']                                                              | ['C80.1', 'C79.51', 'C78.7', 'C78.01', 'C79.11', 'C77.0', 'C78.00', 'C79.70', 'C77.9', 'C79.9', 'C78.2', 'C79.60', 'C79.31', 'C77.8', 'C78.1', 'C78.6', 'C77.1', 'C79.89', 'C80.0', 'C78.02', 'C80.2', 'C79.2', 'C77.2', 'C78.4', 'C79.10', 'C79.82', 'C78.89', 'C79.49', 'C77.3', 'C77.4', 'C77.5', 'C79.00', 'C79.52', 'C78.39', 'C79.71', 'C79.01', 'C78.5', 'C79.19', 'C79.72', 'C79.02', 'C79.32', 'C79.61', 'C79.62', 'C79.81', 'C78.80', 'C78.30']                                                                                                                                                                                                                                                                                                                                     | ['196.3', '198.2', '198.3', '198.89', '199.1', '199', '199.0', '198.5', '196.0', '197.0', '196.1', '196.9', '198.7', '197.7', '198.6', '196.2', '197.4', '197.5', '197.6', '198.82', '198.81', '197.8', '196.6', '196.5', '198.1', '197.2', '198.4', '199.2', '196.8', '198.0', '197.3', '197.1', '196']                                                                                                                                                                                                             |
| Obesity                      | ['E66']                                                                                        | ['2780']                                                                  | ['E66.9', 'E66.01', 'E66.3', 'E66.2', 'E66.8', 'E66.09']                                                                                                                                                                                                                                                                                                                                                                                                                                                                                                                                                                                                                                                                                                                                      | ['278.00', '278.01', '278.02', '278.03', '278.0']                                                                                                                                                                                                                                                                                                                                                                                                                                                                    |
| Other neurological disorders | ['G1[0123]', 'G2[012]', 'G25[45]', 'G31[289]', 'G3[2567]', 'G4[01]', 'G93[14]', 'R470', 'R56'] | ['3319', '332[01]', '333[45]', '33([45]62)', '34([015]8[13])', '78[04]3'] | ['R47.01', 'R47.02', 'R56.9', 'G31.84', 'G20', 'G40.909', 'G40.409', 'G40.109', 'G40.009', 'G35', 'G36.0', 'G13.0', 'G40.209', 'G11.9', 'G93.40', 'G40.301', 'G93.49', 'G40.802', 'G40.201', 'G31.83', 'G21.19', 'G40.219', 'G25.4', 'G93.41', 'G21.9', 'G37.9', 'G31.9', 'R56.1', 'G10', 'G12.21', 'G40.89', 'G40.119', 'G40.309', 'G40.801', 'G40.019', 'G40.B09', 'G40.A09', 'G40.001', 'G40.901', 'G37.3', 'G25.5', 'G11.3', 'G40.311', 'G40.319', 'G31.89', 'G11.8', 'G32.81', 'G31.85', 'G93.1', 'G40.111', 'G31.2', 'G40.B19', 'G40.419', 'G40.211', 'G40.911', 'G12.20', 'G40.804', 'G40.401', 'G40.501', 'G13.1', 'G11.4']                                                                                                                                                           | ['345.90', '345.80', '780.39', '334.4', '345.40', '332.0', '784.3', '348.39', '780.31', '348.30', '345.3', '345.10', '345.50', '345.91', '340', '341.0', '348.31', '345.00', '345.41', '335.10', '334.9', '334.3', '341.9', '348.1', '345.2', '331.9', '341.2', '332.1', '334.2', '333.5', '335.21', '335.20', '780.33', '333.4', '345.51', '345.71', '345.70', '341.8', '345.11', '334.0', '345.01', '334.1']                                                                                                       |

|                                                 |                                                                           |                                                                    |                                                                                                                                                                                                                                                                                                                                                                                                                                                                                 |                                                                                                                                                                                                                                                                                                                                                                            |
|-------------------------------------------------|---------------------------------------------------------------------------|--------------------------------------------------------------------|---------------------------------------------------------------------------------------------------------------------------------------------------------------------------------------------------------------------------------------------------------------------------------------------------------------------------------------------------------------------------------------------------------------------------------------------------------------------------------|----------------------------------------------------------------------------------------------------------------------------------------------------------------------------------------------------------------------------------------------------------------------------------------------------------------------------------------------------------------------------|
| Pulmonary circulation disorder                  | ['I2([67]8[089])']                                                        | ['415[01]', '416', '417[089]']                                     | ['I27.2', 'I27.0', 'I26.09', 'I26.99', 'I27.9', 'I27.82', 'I26.90', 'I28.8', 'I27.81', 'I26.02', 'I27.20', 'I27.89', 'I27.21', 'I27.29', 'I26.92', 'I28.0']                                                                                                                                                                                                                                                                                                                     | ['416.9', '416.8', '416.0', '415.19', '416.2', '415.11', '415.13', '415.0', '417.8', '417.0', '415.12', '417.9']                                                                                                                                                                                                                                                           |
| Peptic ulcer disease excluding bleeding         | ['K2[5678][79]']                                                          | ['53[1234][79]']                                                   | ['K25.9', 'K26.9', 'K27.9', 'K25.7', 'K28.9']                                                                                                                                                                                                                                                                                                                                                                                                                                   | ['533.90', '531.90', '532.90', '531.70', '534.90', '531.71', '532.70', '531.91', '534.70', '534.91', '533.70', '532.91']                                                                                                                                                                                                                                                   |
| Pulmonary valvular disorder                     | ['I7([01]3[189]71[9[02]'), 'K55[189]', 'Z95[89]']                         | ['0930', '4373', '44([01]3[123456789]), '4471', '557[19]', 'V434'] | ['Z95.810', 'I70.0', 'I73.9', 'I71.4', 'I71.2', 'I70.209', 'Z95.820', 'Z95.828', 'I71.6', 'I70.219', 'I70.212', 'I70.92', 'Z95.818', 'Z95.9', 'I70.312', 'I77.1', 'I70.8', 'I71.3', 'I71.9', 'I70.261', 'I71.01', 'K55.9', 'I70.201', 'K55.8', 'Z95.811', 'I70.262', 'I71.1', 'I70.90', 'I70.203', 'I70.1', 'I70.213', 'I70.211', 'K55.1', 'I70.245', 'I71.03', 'I70.91', 'I71.02', 'I71.00', 'I70.293', 'I70.25', 'I71.5', 'I70.235', 'I70.361', 'I73.89', 'I70.221', 'I73.1'] | ['441.2', '437.3', '440.9', '440.23', '443.9', '557.9', '440.0', '440.21', '441.4', '440.20', '447.1', '443.89', '440.31', '443.21', '557.1', '441.00', '441.7', '440.4', '441.9', '440.8', '440.24', '440.30', '440.1', '440.22', '441.01', '441.02', '441.3', '443.81', '443.24', '443.82', '443.29', '443.22', '441.03', '440.29', 'V43.4', '441.1', '440.32', '443.1'] |
| Paralysis                                       | ['G041', 'G114', 'G8(0[12][12]3[01234569])']                              | ['3341', '34([23]4[01234569])']                                    | ['G83.4', 'G82.52', 'G81.91', 'G81.90', 'G83.0', 'G81.94', 'G82.22', 'G82.20', 'G83.9', 'G83.11', 'G80.1', 'G83.10', 'G81.14', 'G82.50', 'G82.21', 'G81.93', 'G81.92', 'G11.4']                                                                                                                                                                                                                                                                                                 | ['344.60', '342.92', '343.9', '342.90', '344.04', '344.9', '344.2', '344.61', '344.5', '342.10', '342.91', '344.1', '344.30', '342.12', '342.01', '344.00', '342.02', '344.40', '343.8', '343.0', '342.80', '342.82', '343.1', '342.00', '334.1']                                                                                                                          |
| Psychoses                                       | ['F2[0234589]', 'F3([01]2[15])']                                          | ['2938', '296[0145]4', '29[578]']                                  | ['F20.9', 'F25.9', 'F20.0', 'F20.3', 'F24', 'F20.1', 'F20.89', 'F20.81', 'F23', 'F25.0', 'F22', 'F31.5', 'F29', 'F28']                                                                                                                                                                                                                                                                                                                                                          | ['293.83', '297.1', '297.9', '298.9', '295.70', '295.90', '295.72', '295.30', '295.60', '295.62', '295.00', '295.74', '295.45', '295.95', '293.84', '295.32', '297.3', '298.8', '295.92', '295.10', '295.42', '296.44', '298.1', '293.82', '295.40', '298.2', '295.80', '295.34', '293.89', '298.3', '295.50', '296.54', '295.94']                                         |
| Renal failure                                   | ['I120', 'I131', 'N1[89]', 'N250', 'Z49[012]', 'Z940', 'Z992']            | ['403', '404', '58([56]80)', 'V4(20[51]', 'V56']                   | ['N18.2', 'N18.9', 'N18.3', 'N18.1', 'N18.4', 'I12.0', 'N18.6', 'Z99.2', 'N19', 'N18.5', 'Z94.0', 'N25.0', 'Z49.01', 'I13.10']                                                                                                                                                                                                                                                                                                                                                  | ['403.90', '585.9', '585.3', '585.5', '403.10', '404.90', '585.4', '403.00', '404.91', '585.2', '403.11', '585', '403.91', '585.6', 'V45.11', '585.1', '586', 'V42.0', '404.11', '588.0', 'V45.1', 'V56.1', 'V56.2', 'V45.12', '404.00', '404.01', 'V56.0', '404.93', '404.10', '403.01', '404.03', '404.12', '404.92', 'V56.8']                                           |
| Rheumatoid arthritis/collagen vascular diseases | ['L94[013]', 'M0[568]', 'M12[03]', 'M3(0[1]0123)[[2345]), 'M4(5[6[189])'] | ['446', '7010', '71(0[0123489]12[4]93)', '72([05]8[58]93)']        | ['M06.9', 'M32.9', 'M35.8', 'M35.9', 'M35.00', 'M35.3', 'M46.87', 'M33.90', 'M46.1', 'M06.4', 'M46.92', 'M33.20', 'M32.10', 'M32.14', 'M31.1', 'M32.13', 'M31.30', 'M06.011', 'M32.19', 'M34.1', 'M46.86', 'M35.1', 'M35.2', 'M34.9', 'M06.851', 'M06.852', 'M46.96', 'M45.9', 'L94.0', 'M35.01', 'M06.00', 'M34.89', 'M06.09', 'M31.0', 'M34.81', 'M33.22',                                                                                                                    | ['728.85', '714.0', '720.2', '728.88', '728.87', '446.5', '710.0', '710.9', '710.2', '701.0', '710.8', '725', '728.89', '728.84', '714.9', '710.3', '719.32', '714.81', '720.9', '714.89', '720.0', '729.39', '710.4', '728.83', '710.1', '728.86', '446.4', '714.30', '446.6', '446.0', '729.30', '728.5', '714.1', '446.20', '446.7', '728.82',                          |

|                                |                                                                                                       |                                                   |                                                                                                                                                                                                                                                                                                                                                                                                                                                                                                                                                                                                                                                                                                                                                                                                                                                                                                                                                                                                                                                                                                                                                                                                                                                                                                                                                                                                                                                                                                                                                                                                                                                                                                                                                                                                                                                                                                                 |                                                                                                                                                                                                                                                                                                                                                                                                                                                                                                                                                                                                                                                                                                                                                                                                                                                                                                                                                                                                                                                                                                                                                                                                                                                                                                                                                                                                                                                                                                                                                                                                                                                                                                                                                                                                                                                                                                                                                                                                                                                                                                                                      |
|--------------------------------|-------------------------------------------------------------------------------------------------------|---------------------------------------------------|-----------------------------------------------------------------------------------------------------------------------------------------------------------------------------------------------------------------------------------------------------------------------------------------------------------------------------------------------------------------------------------------------------------------------------------------------------------------------------------------------------------------------------------------------------------------------------------------------------------------------------------------------------------------------------------------------------------------------------------------------------------------------------------------------------------------------------------------------------------------------------------------------------------------------------------------------------------------------------------------------------------------------------------------------------------------------------------------------------------------------------------------------------------------------------------------------------------------------------------------------------------------------------------------------------------------------------------------------------------------------------------------------------------------------------------------------------------------------------------------------------------------------------------------------------------------------------------------------------------------------------------------------------------------------------------------------------------------------------------------------------------------------------------------------------------------------------------------------------------------------------------------------------------------|--------------------------------------------------------------------------------------------------------------------------------------------------------------------------------------------------------------------------------------------------------------------------------------------------------------------------------------------------------------------------------------------------------------------------------------------------------------------------------------------------------------------------------------------------------------------------------------------------------------------------------------------------------------------------------------------------------------------------------------------------------------------------------------------------------------------------------------------------------------------------------------------------------------------------------------------------------------------------------------------------------------------------------------------------------------------------------------------------------------------------------------------------------------------------------------------------------------------------------------------------------------------------------------------------------------------------------------------------------------------------------------------------------------------------------------------------------------------------------------------------------------------------------------------------------------------------------------------------------------------------------------------------------------------------------------------------------------------------------------------------------------------------------------------------------------------------------------------------------------------------------------------------------------------------------------------------------------------------------------------------------------------------------------------------------------------------------------------------------------------------------------|
|                                |                                                                                                       |                                                   | 'M46.82', 'M30.0', 'M35.09', 'M08.00', 'M05.9', 'M33.92', 'M46.90', 'M05.79', 'M05.871', 'M35.7', 'M31.31', 'M30.1', 'M06.1', 'M06.30', 'M30.3', 'M08.3']                                                                                                                                                                                                                                                                                                                                                                                                                                                                                                                                                                                                                                                                                                                                                                                                                                                                                                                                                                                                                                                                                                                                                                                                                                                                                                                                                                                                                                                                                                                                                                                                                                                                                                                                                       | '719.30', '714.2', '720.81', '446.29', '720.89', '446.1', '720.1']                                                                                                                                                                                                                                                                                                                                                                                                                                                                                                                                                                                                                                                                                                                                                                                                                                                                                                                                                                                                                                                                                                                                                                                                                                                                                                                                                                                                                                                                                                                                                                                                                                                                                                                                                                                                                                                                                                                                                                                                                                                                   |
| Solid tumor without metastasis | ['C[01]', 'C2[0123456]', 'C3[01234789]', 'C4[01356789]', 'C5[012345678]', 'C6', 'C7[0123456]', 'C97'] | ['1[456]', '17[012456789]', '18', '19([012345)]'] | ['C34.90', 'C34.12', 'C34.92', 'C50.912', 'C50.911', 'C50.919', 'C43.70', 'C43.60', 'C43.0', 'C25.0', 'C25.9', 'C64.9', 'C61', 'C34.30', 'C18.9', 'C43.9', 'C34.81', 'C54.1', 'C54.9', 'C07', 'C15.9', 'C67.2', 'C67.9', 'C34.2', 'C34.31', 'C34.00', 'C34.91', 'C34.11', 'C16.9', 'C49.9', 'C17.9', 'C26.0', 'C34.32', 'C23', 'C67.0', 'C67.8', 'C22.1', 'C20', 'C46.0', 'C55', 'C56.9', 'C22.0', 'C73', 'C50.412', 'C24.1', 'C34.02', 'C50.112', 'C34.10', 'C32.9', 'C64.2', 'C18.1', 'C18.0', 'C25.8', 'C08.9', 'C19', 'C45.0', 'C21.0', 'C21.1', 'C76.3', 'C50.212', 'C22.8', 'C43.4', 'C51.9', 'C50.812', 'C71.9', 'C50.811', 'C52', 'C24.9', 'C45.9', 'C41.0', 'C76.0', 'C62.91', 'C63.7', 'C32.1', 'C34.01', 'C22.9', 'C71.2', 'C46.9', 'C41.1', 'C50.419', 'C49.6', 'C49.0', 'C30.1', 'C50.511', 'C71.1', 'C54.0', 'C18.5', 'C18.4', 'C50.819', 'C56.2', 'C25.3', 'C43.59', 'C67.4', 'C62.90', 'C37', 'C66.9', 'C06.9', 'C47.3', 'C06.2', 'C47.9', 'C01', 'C53.9', 'C50.211', 'C22.7', 'C68.8', 'C68.0', 'C25.7', 'C67.5', 'C16.0', 'C43.71', 'C64.1', 'C65.9', 'C15.5', 'C15.3', 'C41.9', 'C40.20', 'C49.12', 'C76.42', 'C69.12', 'C49.22', 'C49.20', 'C10.9', 'C14.0', 'C26.9', 'C31.9', 'C11.9', 'C30.0', 'C17.0', 'C50.611', 'C50.219', 'C50.411', 'C34.80', 'C57.00', 'C50.312', 'C25.4', 'C43.31', 'C04.9', 'C25.2', 'C02.9', 'C26.1', 'C49.5', 'C17.2', 'C47.5', 'C47.0', 'C72.0', 'C10.4', 'C18.7', 'C68.9', 'C43.30', 'C53.0', 'C18.2', 'C50.921', 'C57.02', 'C09.0', 'C50.612', 'C25.1', 'C21.8', 'C50.311', 'C18.6', 'C69.00', 'C69.01', 'C75.9', 'C09.9', 'C71.8', 'C71.4', 'C31.0', 'C05.0', 'C48.0', 'C71.3', 'C71.6', 'C74.91', 'C49.3', 'C50.822', 'C41.3', 'C56.1', 'C74.90', 'C62.92', 'C62.12', 'C03.9', 'C16.1', 'C02.1', 'C11.2', 'C69.92', 'C69.22', 'C69.90', 'C69.32', 'C76.2', 'C43.62', 'C72.9', 'C02.0', 'C76.1', 'C50.011', 'C34.82', 'C50.319', 'C57.9', 'C17.1', 'C48.1', | ['174.9', '174.1', '174.3', '171.4', '174.4', '172.0', '172.6', '172.5', '188.9', '172.9', '172.7', '189.0', '185', '162.3', '162.5', '162.9', '153.2', '153.9', '153.3', '171.5', '171.9', '174.2', '174.0', '182.0', '184.9', '150.4', '150.9', '174.8', '152.9', '183.0', '152.1', '193', '172.2', '188.8', '156.0', '188.0', '188.4', '155.1', '154.1', '176.0', '179', '183.8', '162.8', '151.9', '190.1', '174.5', '156.2', '183', '190.3', '153.8', '161.9', '161.0', '162.2', '182.1', '163.9', '157.0', '157.9', '174.6', '142.9', '142.1', '153.0', '153.1', '150.8', '150.0', '153.6', '155.0', '154.0', '154.3', '172.4', '184.4', '153.4', '171.2', '171.0', '155.2', '188.2', '151.0', '191.9', '191.1', '192.9', '170.0', '186.9', '187.9', '187.8', '187.7', '158.9', '161.1', '195.0', '191.2', '176.9', '183.3', '170.1', '145.9', '145.6', '143.1', '180.8', '151.3', '175.9', '154.2', '157.3', '164.9', '164.2', '189.9', '174', '164.0', '149.0', '180.9', '189.2', '189.1', '156.1', '146.0', '146.9', '150.5', '147.9', '141.0', '141.9', '180.1', '180.0', '151.8', '162.4', '188.1', '151.4', '189.3', '184.0', '159.9', '157.8', '171.3', '190.6', '152.0', '156.9', '159.8', '171.6', '153.5', '192.2', '158.0', '183.2', '154.8', '190.2', '190.7', '142.0', '147.0', '157.4', '172.3', '170.4', '176.4', '156.8', '170.9', '144.9', '195.8', '152.2', '194.0', '170.2', '195.5', '190.5', '189.8', '159.1', '153.7', '142.8', '158.8', '157.2', '146.1', '144.8', '149.8', '148.1', '195.1', '150.2', '195.2', '194.9', '183.9', '176.8', '160.2', '145.2', '147.8', '145.0', '191.3', '191.8', '191.6', '191.7', '141.1', '141.2', '157.1', '170.3', '143.9', '143.8', '192.1', '145.3', '147.1', '141.6', '171.8', '190.9', '160.9', '160.0', '188.6', '172.8', '148.8', '161.3', '141.8', '170.7', '145.4', '195', '195.3', '194.3', '146.2', '183.4', '145.8', '144.0', '140.8', '140.0', '140.9', '149.9', '141.3', '146.8', '184', '188.7', '163.0', '163.1', '188.3', '176.2', '172', '172.1', '184.1', '191.0', '151.2', '171.7', '151.1', '146.3', '186.0', '188.5', '195.4', '175.0', '182', |



|                  |                                                                        |                                                          |                                                                                                                                                                                                                                                                                                                                                                                                                                                                                                                                                                                                                                                                                                                                                                                                                                                                                                                                                                                                                                                                                                                                                                                                                                                                                                                                                                                                                                                                                                                                                                                       |                                                                                                                                                                                                                                                                                                                                                                                                                                                                                                                                    |
|------------------|------------------------------------------------------------------------|----------------------------------------------------------|---------------------------------------------------------------------------------------------------------------------------------------------------------------------------------------------------------------------------------------------------------------------------------------------------------------------------------------------------------------------------------------------------------------------------------------------------------------------------------------------------------------------------------------------------------------------------------------------------------------------------------------------------------------------------------------------------------------------------------------------------------------------------------------------------------------------------------------------------------------------------------------------------------------------------------------------------------------------------------------------------------------------------------------------------------------------------------------------------------------------------------------------------------------------------------------------------------------------------------------------------------------------------------------------------------------------------------------------------------------------------------------------------------------------------------------------------------------------------------------------------------------------------------------------------------------------------------------|------------------------------------------------------------------------------------------------------------------------------------------------------------------------------------------------------------------------------------------------------------------------------------------------------------------------------------------------------------------------------------------------------------------------------------------------------------------------------------------------------------------------------------|
|                  |                                                                        |                                                          | 'C48.2', 'C65.2', 'C66.2', 'C50.519', 'C70.0', 'C62.10', 'C05.1', 'C57.01', 'C50.512', 'C49.21', 'C02.3', 'C06.0', 'C04.0', 'C06.80', 'C57.4', 'C70.9', 'C67.7', 'C32.0', 'C43.61', 'C49.A2', 'C54.8', 'C65.1', 'C74.92', 'C50.111', 'C43.72', 'C38.4', 'C16.2', 'C43.39', 'C40.01', 'C40.00', 'C40.02', 'C50.929', 'C50.922', 'C50.021', 'C70.1', 'C33', 'C76.52', 'C15.8', 'C31.1', 'C43.10', 'C69.91', 'C69.30', 'C67.1', 'C71.0', 'C15.4', 'C53.8', 'C46.4', 'C75.5', 'C75.2', 'C58', 'C43.20', 'C74.00', 'C49.A0', 'C49.A4', 'C18.3', 'C49.4', 'C13.9', 'C60.1', 'C60.9', 'C71.7', 'C10.0', 'C31.3', 'C31.2', 'C31.8', 'C16.3', 'C67.3', 'C69.21', 'C51.0', 'C16.5', 'C38.1', 'C49.10', 'C75.1', 'C14.8', 'C54.2', 'C12', 'C49.11', 'C53.1', 'C43.21', 'C75.0', 'C74.10', 'C74.11', 'C22.3', 'C24.0', 'C05.2', 'C69.61', 'C13.0', 'C63.11', 'C50.022', 'C40.21', 'C38.2', 'C67.6', 'C13.1', 'C32.8', 'C09.1', 'C76.8', 'C50.619', 'C41.2', 'C41.4', 'C63.8', 'C16.4', 'C09.8', 'C16.8', 'C48.8', 'C46.1', 'C50.019', 'C38.3', 'C16.6', 'C13.8', 'C04.1', 'C04.8', 'C05.9', 'C08.0', 'C69.52', 'C38.8', 'C10.3', 'C11.1', 'C40.22', 'C45.7', 'C45.1', 'C43.8', 'C50.121', 'C50.119', 'C43.12', 'C69.42', 'C71.5', 'C50.012', 'C43.52', 'C02.4', 'C74.02', 'C43.22', 'C03.0', 'C66.1', 'C76.51', 'C69.51', 'C69.50', 'C00.0', 'C10.8', 'C74.12', 'C22.2', 'C72.59', 'C32.3', 'C69.10', 'C32.2', 'C11.8', 'C11.3', 'C54.3', 'C69.62', 'C51.8', 'C10.2', 'C49.8', 'C62.11', 'C10.1', 'C69.60', 'C69.11', 'C47.22', 'C72.32', 'C22.4', 'C03.1', 'C40.11', 'C68.1', 'C69.41', 'C39.9'] | '191.4', '151.6', '161.8', '162', '159.0', '191.5', '194.6', '171', '162.0', '148.9', '190.4', '151.5', '182.8', '164.1', '161.2', '140.4', '140.1', '147.2', '146.4', '160.5', '141', '150.3', '150.1', '184.8', '160.8', '170.6', '194.1', '148.0', '148.2', '170.8', '192.0', '160.3', '146', '187.2', '187.4', '176.3', '194.8', '176.1', '144.1', '145.5', '141.4', '160.4', '146.7', '153', '161', '189', '164.3', '194.5', '143.0', '170.5', '152', '164.8', '163.8', '146.6', '141.5', '148.3', '145.1', '146.5', '152.8'] |
| Valvular disease | ['A520', 'I0[5678]', 'I09[18]', 'I3[456789]', 'Q23[0123]', 'Z95[234]'] | ['0932', '39[4567]', '424', '746[3456]', 'V422', 'V433'] | ['I05.9', 'I34.0', 'Z95.4', 'I35.1', 'I35.9', 'Z95.2', 'I38', 'I08.3', 'I35.0', 'I07.1', 'I34.1', 'I35.8', 'I08.0', 'I08.2', 'I36.1', 'Z95.3', 'I35.2', 'I05.0', 'I08.1', 'I05.2', 'I06.1', 'I06.0', 'Q23.1', 'I09.81', 'I37.0', 'I06.2', 'Q23.0', 'I07.9', 'I05.1', 'I34.8', 'I36.9', 'I37.1', 'I34.2']                                                                                                                                                                                                                                                                                                                                                                                                                                                                                                                                                                                                                                                                                                                                                                                                                                                                                                                                                                                                                                                                                                                                                                                                                                                                              | ['424.0', '424.1', '397.0', '394.9', '424.90', '395.0', 'V43.3', '396.3', 'V42.2', '746.6', '396.2', '424.2', '396.8', '746.4', '394.2', '394.1', '396.9', '394.0', '395.1', '746.3', '396.0', '424.91', '424.3', '396.1', '746.5', '395.2', '395.9', '397.9', '424.99', '424']                                                                                                                                                                                                                                                    |
| Weight loss      | ['E4[0123456]', 'R634', 'R64']                                         | ['26[0123]', '7832', '7994']                             | ['R63.4', 'E44.0', 'E43', 'E44.1', 'E46', 'R64', 'E40', 'E41']                                                                                                                                                                                                                                                                                                                                                                                                                                                                                                                                                                                                                                                                                                                                                                                                                                                                                                                                                                                                                                                                                                                                                                                                                                                                                                                                                                                                                                                                                                                        | ['783.21', '263.9', '261', '262', '799.4', '263.0', '263.1', '783.22', '263.8', '260']                                                                                                                                                                                                                                                                                                                                                                                                                                             |

## II. Stepwise logistic regression output

### Logit Regression Results

```

=====
Dep. Variable:          label    No. Observations:          18567
Model:                 Logit    Df Residuals:              18532
Method:                MLE      Df Model:                   34
Date:                  Thu, 22 Aug 2019    Pseudo R-squ.:             0.2369
Time:                  11:50:07    Log-Likelihood:            -2312.0
converged:             True      LL-Null:                   -3029.7
Covariance Type:      nonrobust    LLR p-value:               4.679e-280
=====

```

|                            | coef    | std err | z       | P> z  | [0.025 | 0.975] |
|----------------------------|---------|---------|---------|-------|--------|--------|
| intercept                  | -3.9880 | 0.061   | -65.132 | 0.000 | -4.108 | -3.868 |
| MCHC: last                 | -0.1918 | 0.041   | -4.720  | 0.000 | -0.271 | -0.112 |
| Platelets: last            | -0.0584 | 0.035   | -1.656  | 0.098 | -0.127 | 0.011  |
| Red Blood Cells: last      | -0.2117 | 0.042   | -5.005  | 0.000 | -0.295 | -0.129 |
| Calcium: last              | 0.1127  | 0.035   | 3.204   | 0.001 | 0.044  | 0.182  |
| Alkaline Phosphatase: last | 0.1147  | 0.020   | 5.622   | 0.000 | 0.075  | 0.155  |
| Albumin: last              | -0.3849 | 0.038   | -10.250 | 0.000 | -0.458 | -0.311 |
| Q-T Interval: last         | -0.0889 | 0.029   | -3.072  | 0.002 | -0.146 | -0.032 |
| FERRITIN: last             | 0.0499  | 0.021   | 2.400   | 0.016 | 0.009  | 0.091  |
| IMMUNOGLOBULINS A: last    | 0.0563  | 0.024   | 2.373   | 0.018 | 0.010  | 0.103  |
| RBC: last                  | -0.1804 | 0.036   | -4.975  | 0.000 | -0.251 | -0.109 |
| BUN: last                  | 0.1114  | 0.025   | 4.509   | 0.000 | 0.063  | 0.160  |
| Beta-Globulin Fracti: last | -0.0683 | 0.033   | -2.071  | 0.038 | -0.133 | -0.004 |
| n_METS_recent              | 0.2247  | 0.026   | 8.525   | 0.000 | 0.173  | 0.276  |
| n_WL_recent                | 0.0682  | 0.024   | 2.819   | 0.005 | 0.021  | 0.116  |
| n_DA_recent                | -0.0929 | 0.053   | -1.745  | 0.081 | -0.197 | 0.011  |
| n_Lymp                     | -0.2457 | 0.102   | -2.420  | 0.016 | -0.445 | -0.047 |
| n_Lymp_recent              | 0.2746  | 0.080   | 3.419   | 0.001 | 0.117  | 0.432  |
| n_PCD_recent               | 0.0825  | 0.028   | 2.918   | 0.004 | 0.027  | 0.138  |
| n_Obesity_recent           | -0.0825 | 0.047   | -1.757  | 0.079 | -0.175 | 0.010  |
| n_HPTN_UC_recent           | -0.1040 | 0.041   | -2.519  | 0.012 | -0.185 | -0.023 |
| n_Fluid_recent             | 0.1046  | 0.026   | 3.966   | 0.000 | 0.053  | 0.156  |
| n_OthND_recent             | 0.1050  | 0.028   | 3.794   | 0.000 | 0.051  | 0.159  |
| n_PVD                      | 0.0635  | 0.032   | 2.004   | 0.045 | 0.001  | 0.126  |
| n_VD_recent                | -0.0899 | 0.043   | -2.114  | 0.035 | -0.173 | -0.007 |

|                 |         |       |        |       |        |        |
|-----------------|---------|-------|--------|-------|--------|--------|
| n_Drug          | 0.0944  | 0.030 | 3.124  | 0.002 | 0.035  | 0.154  |
| n_Diab_C        | 0.1082  | 0.044 | 2.486  | 0.013 | 0.023  | 0.194  |
| n_Diab_C_recent | -0.1011 | 0.048 | -2.106 | 0.035 | -0.195 | -0.007 |
| n_Coag_recent   | 0.0739  | 0.029 | 2.509  | 0.012 | 0.016  | 0.132  |
| n_BLA           | 0.2588  | 0.051 | 5.027  | 0.000 | 0.158  | 0.360  |
| n_BLA_recent    | -0.2777 | 0.077 | -3.613 | 0.000 | -0.428 | -0.127 |
| n_Tumor         | -0.4069 | 0.080 | -5.060 | 0.000 | -0.564 | -0.249 |
| n_Tumor_recent  | 0.7200  | 0.072 | 10.022 | 0.000 | 0.579  | 0.861  |
| PAT_AGE         | 0.4277  | 0.051 | 8.389  | 0.000 | 0.328  | 0.528  |
| SEX_C           | 0.2308  | 0.042 | 5.548  | 0.000 | 0.149  | 0.312  |
| =====           |         |       |        |       |        |        |

### III. Feature Selection

#### 1. Remove variables with zero variance (766 → 751 features)

```
var = train[in_vars].var()
zero_variance_vars = list(var[var == 0.0].index)
zero_variance_vars
# Drop zero variance features
in_vars = [v for v in in_vars if v not in zero_variance_vars]
```

#### 2. Group highly inter-correlated features (751 → 590 features)

```
# drop correlated features, retain a map of redundancy
CORRELATION_THRESHOLD = 0.95

grouped = []
grouped_dict = {}
cor_map = train[in_vars].corr()
for var in cor_map.index:
    if var not in grouped:
        cor_vec = cor_map.loc[var,:]
        idb_cor = cor_vec > CORRELATION_THRESHOLD
        collected = list(cor_vec[idb_cor].index)
        collected = [c for c in collected if c != var]
        grouped.extend(collected)
        grouped_dict.update({var: collected})
# Drop those variables that have been grouped into a single representative
in_vars = [v for v in in_vars if v not in grouped]
```

#### 3. Dropping variables with no mutual optimization (590 → 559 features)

```
from sklearn.feature_selection import SelectKBest
from sklearn.feature_selection import mutual_info_classif
bestfeatures = SelectKBest(score_func=mutual_info_classif, k=10)
fit = bestfeatures.fit(train[in_vars], train['label'])
dfscores = pd.DataFrame(fit.scores_)
dfcolumns = pd.DataFrame(train[in_vars].columns)
#concat two dataframes for better visualization
featureScores = pd.concat([dfcolumns,dfscores],axis=1)
featureScores.columns = ['var','score']
print(featureScores.nlargest(10,'score'))
#drop those with no mutual information
zero_mutual_info_vars = featureScores[featureScores['score'] == 0.0]['var']
].values
zero_mutual_info_vars
in_vars = [v for v in in_vars if v not in zero_mutual_info_vars]
```

## IV. Hyperparameters for random forest and gradient boosting algorithms

### Random Forest

```
RandomForestClassifier(bootstrap=True, compute_importances=None,
    criterion='entropy', max_depth=None, max_features='auto',
    max_leaf_nodes=None, min_density=None, min_samples_leaf=1,
    min_samples_split=2, n_estimators=200, n_jobs=4,
    oob_score=False, random_state=None, verbose=0)
```

### Gradient Boosting

```
GradientBoostingClassifier(criterion='friedman_mse', init=None,
    learning_rate=0.01, loss='deviance', max_depth=10,
    max_features='sqrt', max_leaf_nodes=None,
    min_impurity_decrease=0.0, min_impurity_split=None,
    min_samples_leaf=4, min_samples_split=2,
    min_weight_fraction_leaf=0.0, n_estimators=890,
    n_iter_no_change=5, presort='auto', random_state=42,
    subsample=1.0, tol=0.0001, validation_fraction=0.1,
    verbose=1, warm_start=False)
```

Hyperparameter tuning of the Random Forest and Gradient Boosting models was conducted by random grid search over 500 iterations using k=5-fold cross-validation for a total of 50,000 model fits. The scoring function used was RoC-AUC. The hyper-parameter space searched over and optimal values are presented in the following table.

### Hyperparameter search space

| Model         | Hyperparameter    | Description                                                         | Search Space                                                                           | Optimal |
|---------------|-------------------|---------------------------------------------------------------------|----------------------------------------------------------------------------------------|---------|
| Random Forest | n_estimators      | The number of trees in the forest.                                  | [10, 120, 230, 340, 450, 560, 670, 780, 890, 1000]                                     | 340     |
| Random Forest | max_features      | The number of features to consider when looking for the best split. | ['auto', 'sqrt']                                                                       | 'auto'  |
| Random Forest | max_depth         | Maximum depth of the individual regression estimators.              | [5, 10, 15, 20, 25, 30, 35, 40, 45, 50, 55, 60, 65, 70, 75, 80, 85, 90, 95, 100, None] | 45      |
| Random Forest | min_samples_split | The minimum number of samples required to split an internal node    | [2, 5, 10]                                                                             | 5       |
| Random Forest | min_samples_leaf  | The minimum number of samples required to be at a leaf node.        | [1, 2, 4]                                                                              | 4       |

|                   |                   |                                                                              |                                                                                                                     |            |
|-------------------|-------------------|------------------------------------------------------------------------------|---------------------------------------------------------------------------------------------------------------------|------------|
| Gradient Boosting | max_depth         | Maximum depth of the individual regression estimators.                       | [5, 10, 15, 20, 25, 30, 35, 40, 45, 50, 55, 60, 65, 70, 75, 80, 85, 90, 95, 100, None]                              | 10         |
| Gradient Boosting | max_features      | The number of features to consider when looking for the best split           | ['auto', 'sqrt']                                                                                                    | 'sqrt'     |
| Gradient Boosting | min_samples_leaf  | The minimum number of samples required to be at a leaf node.                 | [1, 2, 4]                                                                                                           | 4          |
| Gradient Boosting | min_samples_split | The minimum number of samples required to split an internal node             | [2, 5, 10]                                                                                                          | 2          |
| Gradient Boosting | n_estimators      | The number of boosting stages to perform.                                    | [10, 120, 230, 340, 450, 560, 670, 780, 890, 1000]                                                                  | 890        |
| Gradient Boosting | subsample         | The fraction of samples to be used for fitting the individual base learners. | [0.5, 0.8, 1.0]                                                                                                     | 1.0        |
| Gradient Boosting | learning_rate     | The learning rate shrinks the contribution of each tree by that value.       | [0.01, 0.031111111, 0.052222222, 0.073333333, 0.094444444, 0.115555556, 0.136666667, 0.157777778, 0.178888889, 0.2] | 0.01       |
| Gradient Boosting | loss              | The loss function to be optimized.                                           | ['deviance', 'exponential']                                                                                         | 'deviance' |

## eReferences.

1. Elfiky AA, Pany MJ, Parikh RB, Obermeyer Z. Development and Application of a Machine Learning Approach to Assess Short-term Mortality Risk Among Patients With Cancer Starting Chemotherapy. *JAMA Netw Open*. 2018;1(3):e180926-e180926. doi:10.1001/jamanetworkopen.2018.0926
2. Bertsimas D, Dunn J, Pawlowski C, et al. Applied Informatics Decision Support Tool for Mortality Predictions in Patients With Cancer. *JCO Clinical Cancer Informatics*. June 2018. doi:10.1200/CCI.18.00003
3. Gupta S, Tran T, Luo W, et al. Machine-learning prediction of cancer survival: a retrospective study using electronic administrative records and a cancer registry. *BMJ Open*. 2014;4(3). doi:10.1136/bmjopen-2013-004007
4. Sahni N, Simon G, Arora R. Development and Validation of Machine Learning Models for Prediction of 1-Year Mortality Utilizing Electronic Medical Record Data Available at the End of Hospitalization in Multicondition Patients: a Proof-of-Concept Study. *J GEN INTERN MED*. 2018;33(6):921-928. doi:10.1007/s11606-018-4316-y
5. Weng SF, Reys J, Kai J, Garibaldi JM, Qureshi N. Can machine-learning improve cardiovascular risk prediction using routine clinical data? *PLoS ONE*. 2017;12(4):e0174944. doi:10.1371/journal.pone.0174944
6. Churpek MM, Yuen TC, Winslow C, Meltzer DO, Kattan MW, Edelson DP. Multicenter Comparison of Machine Learning Methods and Conventional Regression for Predicting Clinical Deterioration on the Wards. *Critical care medicine*. 2016;44(2):368. doi:10.1097/CCM.0000000000001571
7. Taylor RA, Pare JR, Venkatesh AK, et al. Prediction of In-hospital Mortality in Emergency Department Patients With Sepsis: A Local Big Data–Driven, Machine Learning Approach. *Academic emergency medicine : official journal of the Society for Academic Emergency Medicine*. 2016;23(3):269. doi:10.1111/acem.12876

**eFigure 1. Cohort Selection Process**

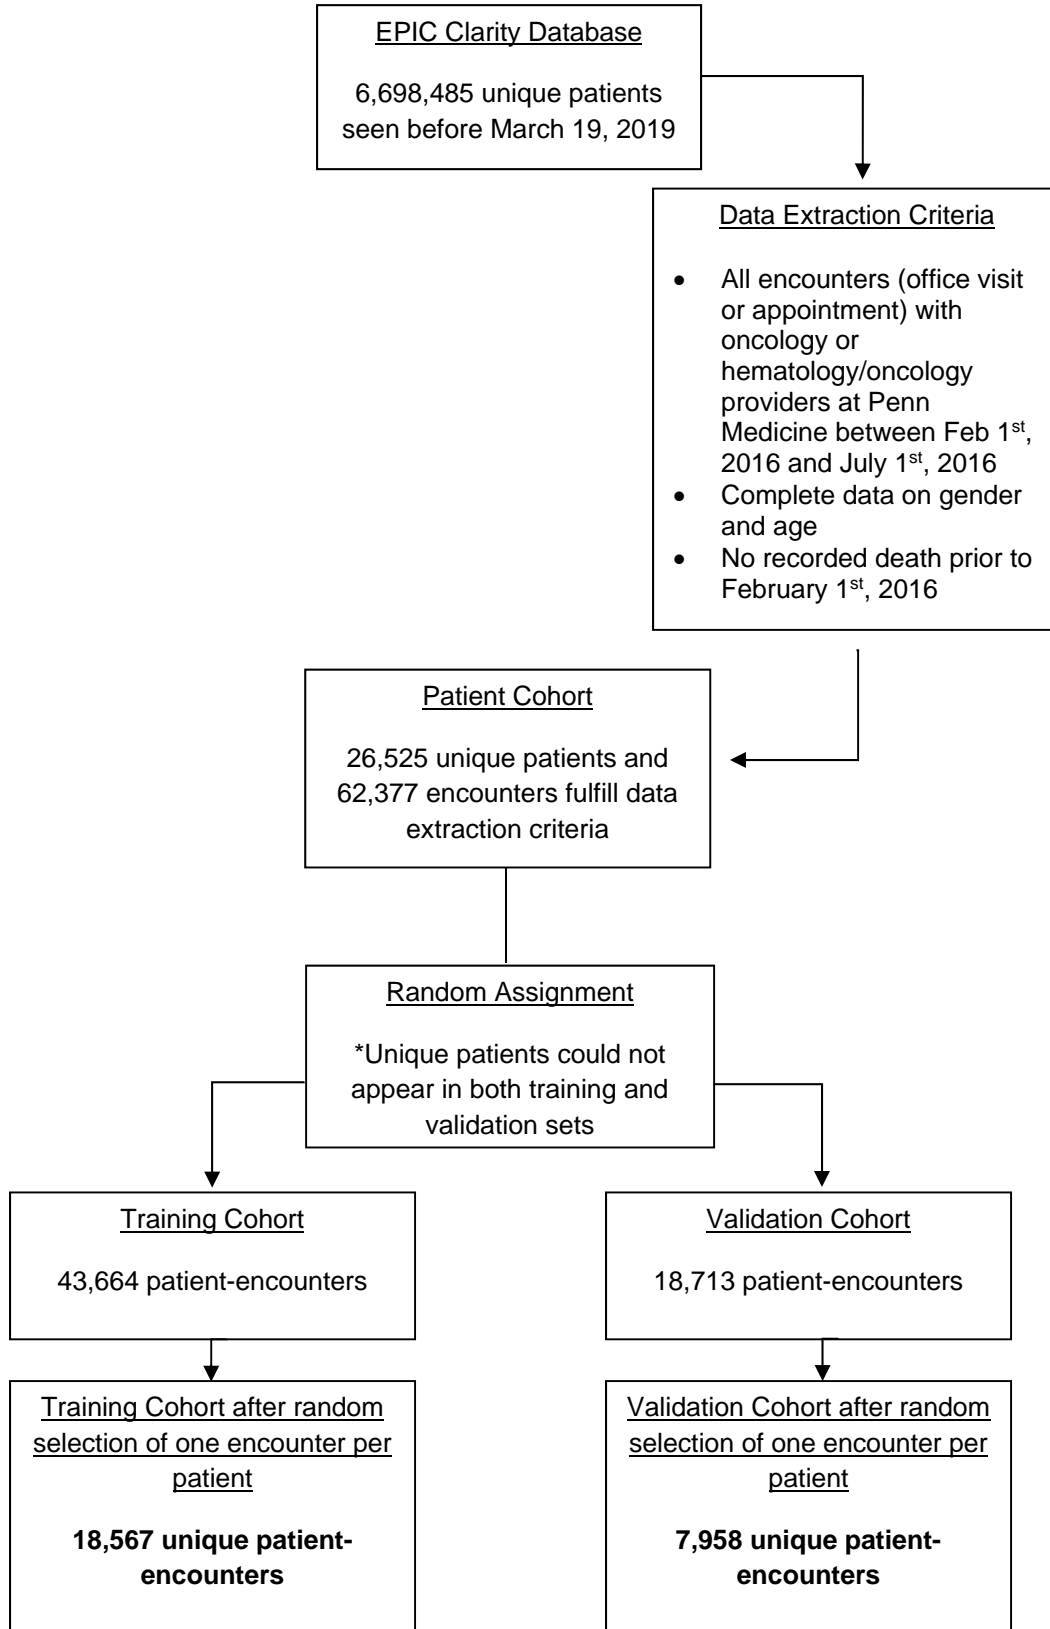



## eFigure 2. Model Calibration Plots

A. Logistic Regression

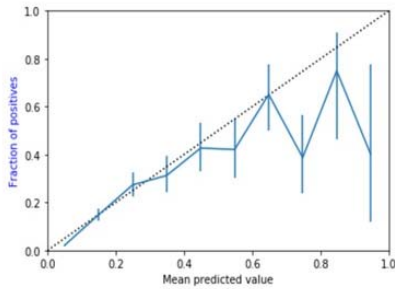

B. Random Forest

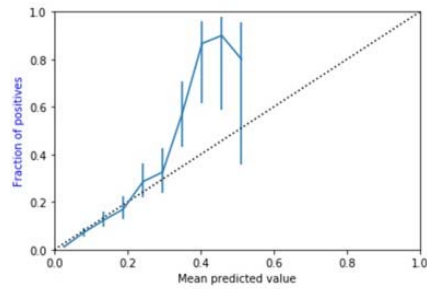

C. Gradient Boosting

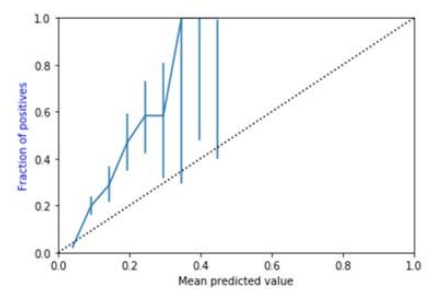

**Footnote:** Calibration plots describing observed (y-axis) vs. predicted (x-axis) mortality for the logistic regression (A), random forest (B), and gradient boosting (C) models. Each point represents one of ten bins of predicted probability of 180-day mortality for each model. The observed rate of 180-day mortality for each of the probability bins is plotted on the y-axis. The 45-degree dotted diagonal line represents points along a perfectly-calibrated model. The bars show 95% confidence intervals around the observed probability.

**eFigure 3.** Observed 180-Day Survival by Varying Risk Thresholds for Random Forest Model

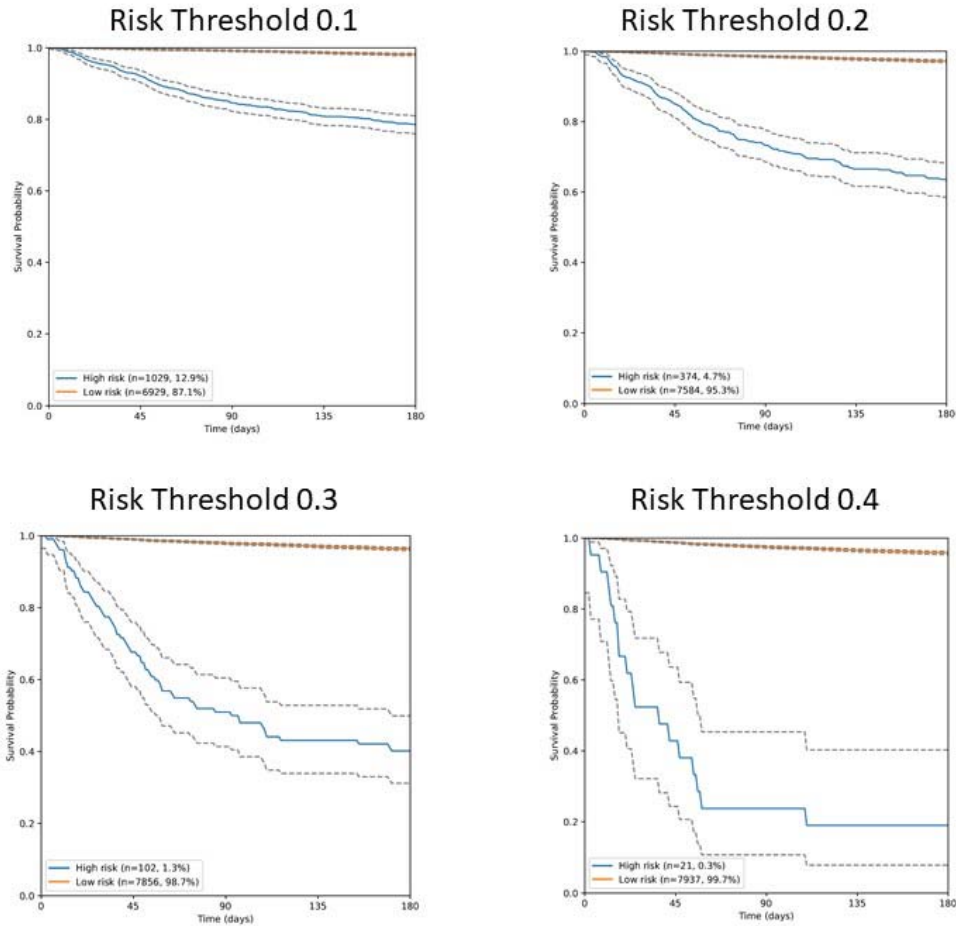

**Footnote:** Risk threshold refers to proportion risk of 180-day mortality, as predicted by the random forest algorithm (e.g. 0.2 = 20% predicted risk). Solid lines refer to observed survival; orange lines refer to patients falling under the risk threshold, whereas blue lines refer to patients falling above the risk threshold. Dotted lines refer to 95% confidence intervals.

**eFigure 4.** Observed 500-Day Survival by Predicted Risk for Random Forest Model

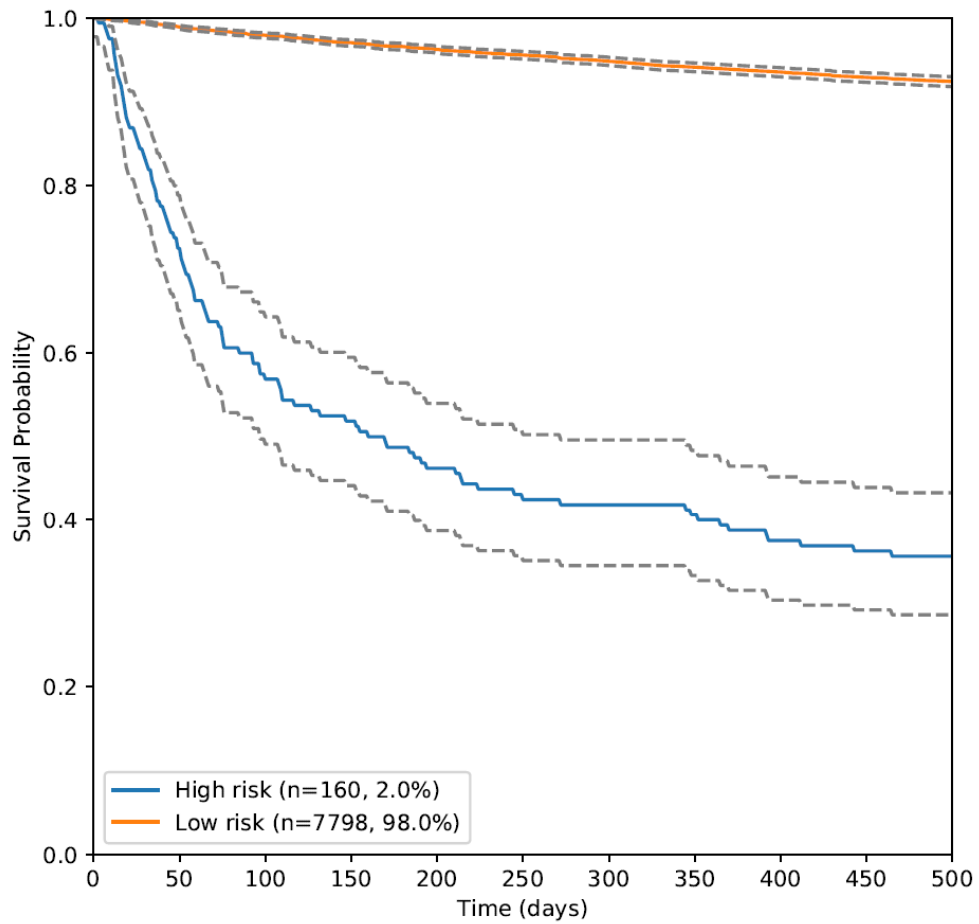

|                      |      |      |      |      |      |      |      |      |      |      |      |
|----------------------|------|------|------|------|------|------|------|------|------|------|------|
| High Risk n Survived | 160  | 116  | 91   | 83   | 74   | 68   | 67   | 65   | 60   | 58   | 57   |
| Low Risk n Survived  | 7798 | 7712 | 7635 | 7567 | 7504 | 7451 | 7393 | 7338 | 7293 | 7243 | 7206 |

**Footnote:** Risk threshold was determined in the random forest model by setting the alert rate to 0.02, which corresponds to a proportion risk of 180-day mortality of 27%. Solid lines refer to observed survival; orange lines refer to patients falling under the risk threshold, whereas blue lines refer to patients falling above the risk threshold. Dotted lines refer to 95% confidence intervals.

**eTable 1.** Published Electronic Health Record-Based Machine Learning Prognostic Tools

| Reference                          | Population                                                                    | Outcome                         | Performance                                            | ML algorithm                                           | Comparator(s)                                                                                         |
|------------------------------------|-------------------------------------------------------------------------------|---------------------------------|--------------------------------------------------------|--------------------------------------------------------|-------------------------------------------------------------------------------------------------------|
| <b>Oncology</b>                    |                                                                               |                                 |                                                        |                                                        |                                                                                                       |
| Elfiky et al, 2018 <sup>1</sup>    | Patients with cancer beginning chemotherapy at a large academic cancer center | 30-day mortality                | AUC 0.94                                               | Gradient-boosted trees                                 | None                                                                                                  |
| Bertsimas et al, 2018 <sup>2</sup> | Patients with cancer beginning chemotherapy at a large academic cancer center | 180-day mortality               | AUC 0.83                                               | Decision tree                                          | None                                                                                                  |
| Gupta et al, 2014 <sup>3</sup>     | Patients with cancer in an Australian regional cancer centre registry         | 6-, 12-, and 24-month mortality | AUC 0.87 (6-month), 0.80 (12-month), & 0.76 (24-month) | Support-vector machine                                 | Clinician panel                                                                                       |
| <b>General medicine or other</b>   |                                                                               |                                 |                                                        |                                                        |                                                                                                       |
| Sahni et al, 2018 <sup>4</sup>     | Minnesota patients admitted to general medicine service                       | 1-year mortality                | AUC 0.86                                               | Random forest                                          | Logistic regression                                                                                   |
| Weng et al, 2017 <sup>5</sup>      | Cardiovascular disease prediction in UK                                       | 10-year cardiovascular event    | AUC 0.76                                               | Neural networks, gradient-boosted trees, random forest | Logistic regression, clinical guidelines                                                              |
| Churpek et al, 2016 <sup>6</sup>   | Hospitalized patients in five hospitals                                       | In-hospital mortality           | AUC 0.80                                               | Many                                                   | Logistic regression, existing early warning score                                                     |
| Taylor et al, 2016 <sup>7</sup>    | Adults visiting the emergency department with sepsis                          | In-hospital mortality           | AUC 0.86                                               | Random forest                                          | Logistic regression, classification and regression tree (CART), previously developed prediction tools |

**eTable 2.** Variables Included in Machine Learning Algorithms

| Laboratories                                    | Units       | Features Included                                                                                                                                          |
|-------------------------------------------------|-------------|------------------------------------------------------------------------------------------------------------------------------------------------------------|
| <b>Age</b>                                      | Years       |                                                                                                                                                            |
| <b>Gender</b>                                   | Male/Female |                                                                                                                                                            |
| <b>Elixhauser comorbidities</b>                 | Count       | <b>Count of number times comorbidity was ever coded (“total”)</b><br><b>Count of number of times comorbidity was coded in the past 180 days (“recent”)</b> |
| Metastatic cancer                               |             |                                                                                                                                                            |
| Diabetes, uncomplicated                         |             |                                                                                                                                                            |
| Alcohol abuse                                   |             |                                                                                                                                                            |
| Rheumatoid arthritis/collagen vascular diseases |             |                                                                                                                                                            |
| Weight loss                                     |             |                                                                                                                                                            |
| Iron deficiency anemia                          |             |                                                                                                                                                            |
| Lymphoma                                        |             |                                                                                                                                                            |
| Cardiac arrhythmias                             |             |                                                                                                                                                            |
| Pulmonary circulation disorder                  |             |                                                                                                                                                            |
| Liver disease                                   |             |                                                                                                                                                            |
| Obesity                                         |             |                                                                                                                                                            |
| Chronic pulmonary disease                       |             |                                                                                                                                                            |
| Hypertension, uncomplicated                     |             |                                                                                                                                                            |
| Fluid and electrolyte disorders                 |             |                                                                                                                                                            |
| Renal failure                                   |             |                                                                                                                                                            |
| Other neurological disorders                    |             |                                                                                                                                                            |
| Pulmonary valvular disorder                     |             |                                                                                                                                                            |
| Peptic ulcer disease excluding bleeding         |             |                                                                                                                                                            |
| Hypothyroidism                                  |             |                                                                                                                                                            |
| Valvular disease                                |             |                                                                                                                                                            |
| Congestive heart failure                        |             |                                                                                                                                                            |
| Depression                                      |             |                                                                                                                                                            |
| Paralysis                                       |             |                                                                                                                                                            |
| Drug abuse                                      |             |                                                                                                                                                            |
| Diabetes, complicated                           |             |                                                                                                                                                            |
| Coagulopathy                                    |             |                                                                                                                                                            |
| Blood loss anemia                               |             |                                                                                                                                                            |
| Solid tumor without metastasis                  |             |                                                                                                                                                            |
| AIDS/HIV                                        |             |                                                                                                                                                            |
| Hypertension, complicated                       |             |                                                                                                                                                            |
| Psychoses                                       |             |                                                                                                                                                            |
| <b>EKG Values</b>                               |             | <b>Count</b><br><b>First value checked</b>                                                                                                                 |
| T Axis                                          | degrees     |                                                                                                                                                            |

|                                |          |                                                                                                                                                                        |
|--------------------------------|----------|------------------------------------------------------------------------------------------------------------------------------------------------------------------------|
| R Axis                         | degrees  | <b>Last value checked</b><br><b>Maximum Value</b><br><b>Minimum Value</b><br><b>Proportion of Values ordered as STAT</b>                                               |
| P Axis                         | degrees  |                                                                                                                                                                        |
| Q-T Interval                   | ms       |                                                                                                                                                                        |
| QRS Duration                   | ms       |                                                                                                                                                                        |
| P-R Interval                   | ms       |                                                                                                                                                                        |
| QTC Calculation(Bazett)        | ms       |                                                                                                                                                                        |
| Atrial Rate                    | BPM      |                                                                                                                                                                        |
| Ventricular Rate               | BPM      |                                                                                                                                                                        |
| <b>Laboratories</b>            |          | <b>Count</b><br><b>First value checked</b><br><b>Last value checked</b><br><b>Maximum Value</b><br><b>Minimum Value</b><br><b>Proportion of Values ordered as STAT</b> |
| % Basophils Manual             | %        |                                                                                                                                                                        |
| % Eosinophils Manual           | %        |                                                                                                                                                                        |
| Reticulocyte count             | %        |                                                                                                                                                                        |
| % Band Neutrophils             | %        |                                                                                                                                                                        |
| % Lymphocytes Manual           | %        |                                                                                                                                                                        |
| % Eosinophils                  | %        |                                                                                                                                                                        |
| % Basophils                    | %        |                                                                                                                                                                        |
| % Lymphocyte Variants          | %        |                                                                                                                                                                        |
| % Segmented Neutrophils Manual | %        |                                                                                                                                                                        |
| % Monocytes                    | %        |                                                                                                                                                                        |
| % Lymphocytes                  | %        |                                                                                                                                                                        |
| % Myelocytes                   | %        |                                                                                                                                                                        |
| % Monocytes Manual             | %        |                                                                                                                                                                        |
| Alkaline Phosphatase           | IU/L     |                                                                                                                                                                        |
| WBC Corrected                  | THO/uL   |                                                                                                                                                                        |
| Abs Retic                      | THO/uL   |                                                                                                                                                                        |
| # Eosinophils Manual           | THO/uL   |                                                                                                                                                                        |
| # Segmented Neutrophils Manual | THO/uL   |                                                                                                                                                                        |
| # Basophils Manual             | THO/uL   |                                                                                                                                                                        |
| # Monocytes Manual             | THO/uL   |                                                                                                                                                                        |
| # Atypical Lymphocytes         | THO/uL   |                                                                                                                                                                        |
| # Lymphocytes Manual           | THO/uL   |                                                                                                                                                                        |
| AST                            | U/L      |                                                                                                                                                                        |
| Lactate dehydrogenase          | U/L      |                                                                                                                                                                        |
| ALT                            | U/L      |                                                                                                                                                                        |
| UA pH                          | [pH]     |                                                                                                                                                                        |
| # Band Neutrophils             | cells/uL |                                                                                                                                                                        |
| MCV                            | fL       |                                                                                                                                                                        |
| RDW                            | fL       |                                                                                                                                                                        |
| Gamma-Globulin Fract           | g/dL     |                                                                                                                                                                        |

|                             |               |
|-----------------------------|---------------|
| MCHC                        | g/dL          |
| Beta-Globulin Fracti        | g/dL          |
| Albumin Fraction            | g/dL          |
| Alpha2-Globulin Fraction    | g/dL          |
| Alpha1-Globulin Fraction    | g/dL          |
| % Nucleated Red Blood Cells | k/cumm        |
| % Neutrophils               | k/uL          |
| eGFR, AA                    | mL/min/1.73m2 |
| eGFR, Non-AA                | mL/min/1.73m2 |
| Magnesium                   | mg/dL         |
| Immunoglobulin G            | mg/dL         |
| Immunoglobulin M            | mg/dL         |
| Fibrinogen                  | mg/dL         |
| BUN                         | mg/dL         |
| Urea Nitrogen               | mg/dL         |
| POC Glucose (Fingerstick)   | mg/dL         |
| Glucose                     | mg/dL         |
| Calcium                     | mg/dL         |
| Bilirubin, Indirect         | mg/dL         |
| Uric acid                   | mg/dL         |
| Bilirubin, Direct           | mg/dL         |
| Phosphate                   | mg/dL         |
| Creatinine                  | mg/dL         |
| Hemoglobin                  | mg/dL         |
| Triglycerides               | mm/l          |
| Total Cholesterol           | mm/l          |
| pCO2 Art                    | mmHg          |
| Carbon Dioxide              | mmol/L        |
| Anion Gap                   | mmol/L        |
| Lactic acid                 | mmol/L        |
| Chloride                    | mmol/L        |
| Sodium                      | mmol/L        |
| Potassium                   | mmol/L        |
| Carcinoembryonic antigen    | ng/mL         |
| Ferritin                    | ng/mL         |
| MCH                         | pg            |
| INR                         | ratio         |
| PTT                         | second(s)     |
| PT                          | seconds       |

|                   |          |  |
|-------------------|----------|--|
| TSH               | u[IU]/mL |  |
| Tacrolimus level  | ug/L     |  |
| # Basophils       | x10E3/uL |  |
| # Neutrophils     | x10E3/uL |  |
| # Monocytes       | x10E3/uL |  |
| # Eosinophils     | x10E3/uL |  |
| White blood cells | x10E3/uL |  |
| Platelets         | x10E3/uL |  |
| # Lymphocytes     | x10E3/uL |  |
| Red blood cells   | x10E6/uL |  |
| Albumin           | g/dL     |  |
| Bilirubin, Total  | mg/dL    |  |
| Immunoglobulins A | mg/dL    |  |
| Protein, Total    | g/dL     |  |

**Footnote:** While all variables in the comorbidity and laboratory sections were included in some form, not all features were included after feature selection. For full list of variables included after feature selection, see <https://github.com/pennsignals/eol-onc>.



**eTable 3.** Performance Characteristics of Gradient Boosting Model Used for Clinician Surveys

|                                                | <b>AU<br/>C</b> | <b>Accura<br/>cy</b> | <b>Alert<br/>Rate<br/>per<br/>10000<br/>patient<br/>s</b> | <b>F1<br/>Score</b> | <b>Negativ<br/>e<br/>predicti<br/>ve<br/>value</b> | <b>Positiv<br/>e<br/>predicti<br/>ve<br/>value</b> | <b>Sensitiv<br/>ity</b> | <b>Specific<br/>ity</b> |
|------------------------------------------------|-----------------|----------------------|-----------------------------------------------------------|---------------------|----------------------------------------------------|----------------------------------------------------|-------------------------|-------------------------|
| Gradi<br>ent<br>boosti<br>ng<br>classifi<br>er | 0.8<br>7        | 0.95287<br>8         | 0.0272<br>68                                              | 0.3386<br>24        | 0.96718<br>8                                       | 0.44239<br>6                                       | 0.27428<br>6            | 0.98409<br>6            |

**eTable 4.** Distribution of Coded Elixhauser Comorbidities

| Comorbidities                                   | Alive at 6 months<br>(N=25460) |      | Died at 6 months<br>(N=1065) |      |
|-------------------------------------------------|--------------------------------|------|------------------------------|------|
|                                                 | n                              | %    | n                            | %    |
| Metastatic cancer                               | 4026                           | 15.8 | 475                          | 44.6 |
| Diabetes uncomplicated                          | 2919                           | 11.5 | 198                          | 18.6 |
| Alcohol abuse                                   | 451                            | 1.8  | 42                           | 3.9  |
| Rheumatoid arthritis/collagen vascular diseases | 1677                           | 6.6  | 84                           | 7.9  |
| Weight loss                                     | 2031                           | 8.0  | 256                          | 24.0 |
| Deficiency anemia                               | 2232                           | 8.8  | 85                           | 8.0  |
| Lymphoma                                        | 4018                           | 15.8 | 121                          | 11.4 |
| Cardiac arrhythmias                             | 2473                           | 9.7  | 214                          | 20.1 |
| Pulmonary circulation disorder                  | 1248                           | 4.9  | 128                          | 12.0 |
| Liver disease                                   | 1487                           | 5.8  | 114                          | 10.7 |
| Obesity                                         | 2771                           | 10.9 | 97                           | 9.1  |
| Chronic pulmonary disease                       | 3631                           | 14.3 | 227                          | 21.3 |
| Hypertension, uncomplicated                     | 8600                           | 33.8 | 472                          | 44.3 |
| Fluid and electrolyte disorders                 | 4526                           | 17.8 | 417                          | 39.2 |
| Renal failure                                   | 1891                           | 7.4  | 151                          | 14.2 |
| Other neurological disorders                    | 1067                           | 4.2  | 102                          | 9.6  |
| Pulmonary valvular disorder                     | 1227                           | 4.8  | 104                          | 9.8  |
| Peptic ulcer disease excluding bleeding         | 415                            | 1.6  | 31                           | 2.9  |
| Hypothyroidism                                  | 3125                           | 12.3 | 145                          | 13.6 |
| Valvular disease                                | 1756                           | 6.9  | 90                           | 8.5  |
| Congestive heart failure                        | 1536                           | 6.0  | 141                          | 13.2 |
| Depression                                      | 3409                           | 13.4 | 176                          | 16.5 |
| Paralysis                                       | 186                            | 0.73 | 26                           | 2.44 |
| Drug abuse                                      | 554                            | 2.2  | 39                           | 3.7  |
| Diabetes complicated                            | 1032                           | 4.1  | 79                           | 7.4  |
| Coagulopathy                                    | 2692                           | 10.6 | 212                          | 19.9 |
| Blood loss anemia                               | 572                            | 2.3  | 27                           | 2.5  |
| Solid tumor without metastasis                  | 13718                          | 53.9 | 778                          | 73.1 |
| AIDS/HIV                                        | 195                            | 0.77 | 8                            | 0.75 |
| Hypertension, complicated                       | 1395                           | 5.5  | 120                          | 11.3 |
| Psychoses                                       | 288                            | 1.1  | 19                           | 1.8  |

**eTable 5.** Baseline Laboratory and Electrocardiogram Values

| Value [mean, 95% CI] | Alive at 6 months (N=25460) | Died at 6 months (N=1065) |
|----------------------|-----------------------------|---------------------------|
| MCV                  | 90.76 [90.68-90.83]         | 90.80 [90.34-91.25]       |
| RDW                  | 15.36 [15.33-15.38]         | 17.06 [16.88-17.25]       |
| MCH                  | 29.89 [29.86-29.92]         | 29.76 [29.59-29.93]       |
| MCHC                 | 32.94 [32.93-32.95]         | 32.73 [32.67-32.79]       |
| Hemoglobin           | 12.16 [12.14-12.18]         | 11.03 [10.92-11.13]       |
| Hematocrit           | 36.85 [36.80-36.91]         | 33.60 [33.28-33.93]       |
| Platelets            | 227.07 [226.09-228.05]      | 229.84 [222.39-237.29]    |
| Red Blood Cells      | 4.09 [4.09-4.10]            | 3.74 [3.70-3.78]          |
| Creatinine           | 0.95 [0.93-0.98]            | 1.03 [0.98-1.08]          |
| White Blood Cells    | 6.98 [6.88-7.08]            | 8.03 [7.62-8.43]          |
| Sodium               | 137.20 [137.18-137.22]      | 136.24 [136.05-136.43]    |
| Urea Nitrogen        | 16.83 [16.74-16.91]         | 18.83 [18.19-19.46]       |
| Chloride             | 103.79 [103.76-103.82]      | 102.58 [102.33-102.84]    |
| Potassium            | 4.13 [4.12-4.13]            | 4.14 [4.11-4.16]          |
| Anion Gap            | 7.07 [7.05-7.09]            | 7.69 [7.54-7.84]          |
| Carbon Dioxide       | 26.31 [26.29-26.34]         | 25.94 [25.75-26.13]       |
| Glucose              | 107.46 [107.10-107.83]      | 117.00 [114.33-119.66]    |
| Calcium              | 9.32 [9.32-9.33]            | 9.15 [9.11-9.20]          |
| ALT                  | 19.97 [19.74-20.21]         | 26.65 [24.33-28.97]       |
| AST                  | 21.95 [21.74-22.15]         | 32.16 [29.39-34.93]       |
| Bilirubin, Total     | 0.55 [0.55-0.56]            | 0.83 [0.70-0.97]          |
| Alkaline Phosphatase | 77.13 [76.59-77.67]         | 122.28 [114.54-130.02]    |
| # Eosinophils        | 6.69 [4.87-8.51]            | 2.83 [1.35-4.31]          |
| # Basophils          | 1.37 [1.01-1.74]            | 0.82 [0.08-1.56]          |
| # Monocytes          | 18.30 [16.02-20.58]         | 17.77 [5.07-30.48]        |
| # Lymphocytes        | 101.89 [68.92-134.85]       | 28.98 [15.31-42.64]       |
| % Monocytes          | 8.67 [8.64-8.70]            | 8.79 [8.58-9.00]          |
| % Lymphocytes        | 22.84 [22.74-22.94]         | 18.06 [17.46-18.66]       |
| # Neutrophils        | 142.63 [130.28-154.98]      | 162.16 [78.66-245.67]     |
| % Eosinophils        | 2.15 [2.13-2.18]            | 1.79 [1.66-1.92]          |
| % Basophils          | 0.57 [0.56-0.58]            | 0.53 [0.49-0.58]          |
| % Neutrophils        | 64.88 [64.77-64.98]         | 70.20 [69.48-70.92]       |
| Albumin              | 4.03 [4.03-4.04]            | 3.66 [3.63-3.69]          |
| Protein, Total       | 6.91 [6.91-6.92]            | 6.73 [6.68-6.78]          |
| Fingerstick glucose  | 122.31 [122.11-122.51]      | 125.22 [123.48-126.96]    |
| MAGNESIUM            | 1.90 [1.90-1.91]            | 1.89 [1.87-1.90]          |
| % Nucleated RBC      | 0.11 [0.07-0.14]            | 0.50 [0.19-0.80]          |

|                                |                        |                        |
|--------------------------------|------------------------|------------------------|
| INR                            | 1.13 [1.13-1.13]       | 1.18 [1.16-1.20]       |
| PT                             | 13.49 [13.46-13.52]    | 14.15 [13.90-14.40]    |
| WBC Corrected                  | 6.44 [6.34-6.54]       | 7.51 [7.03-7.99]       |
| # Band Neutrophils             | 2.08 [0.54-3.62]       | 9.54 [-3.68-22.75]     |
| % Basophils Manual             | 0.08 [0.07-0.08]       | 0.20 [0.16-0.24]       |
| % Eosinophils Manual           | 1.12 [1.10-1.13]       | 1.20 [1.10-1.30]       |
| % Band Neutrophils             | 0.26 [0.24-0.29]       | 0.97 [0.80-1.13]       |
| # Atypical Lymphocytes         | 0.01 [0.00-0.01]       | 0.01 [-0.00-0.01]      |
| % Lymph Variants               | 0.03 [0.03-0.04]       | 0.05 [0.02-0.07]       |
| % Segmented Neutrophils Manual | 63.25 [63.14-63.35]    | 64.79 [63.90-65.68]    |
| % Monocytes Manual             | 7.15 [7.11-7.18]       | 7.69 [7.40-7.98]       |
| % Lymphocytes Manual           | 21.04 [20.94-21.15]    | 19.66 [18.92-20.39]    |
| # Segmented Neutrophils Manual | 3.80 [3.77-3.83]       | 4.94 [4.62-5.27]       |
| PHOSPHATE                      | 3.40 [3.39-3.40]       | 3.50 [3.22-3.77]       |
| PTT                            | 28.51 [28.47-28.55]    | 29.62 [29.26-29.98]    |
| # Basophils Manual             | 0.01 [0.00-0.01]       | 0.01 [0.01-0.02]       |
| # Eosinophils Manual           | 0.05 [0.05-0.05]       | 0.07 [0.06-0.08]       |
| # Monocytes Manual             | 0.44 [0.44-0.45]       | 0.52 [0.48-0.56]       |
| # Lymphocytes Manual           | 1.49 [1.41-1.57]       | 1.19 [1.04-1.34]       |
| LACTATE DEHYDROGENASE          | 199.49 [198.80-200.17] | 233.06 [219.03-247.09] |
| INDIRECT BILI                  | 0.41 [0.41-0.41]       | 0.49 [0.44-0.54]       |
| Bilirubin, Direct              | 0.12 [0.11-0.12]       | 0.27 [0.19-0.35]       |
| URIC ACID                      | 5.04 [5.03-5.04]       | 5.10 [5.03-5.16]       |
| eGFR, Non-AA                   | 53.30 [53.20-53.41]    | 51.67 [51.05-52.30]    |
| Ventricular Rate               | 78.97 [78.88-79.06]    | 81.75 [80.96-82.54]    |
| R Axis                         | 21.20 [20.99-21.42]    | 19.53 [17.99-21.08]    |
| QRS Duration                   | 86.89 [86.79-86.99]    | 87.92 [87.04-88.81]    |
| T Axis                         | 43.32 [43.12-43.52]    | 44.71 [42.95-46.47]    |
| Q-T Interval                   | 388.86 [388.65-389.07] | 383.89 [381.80-385.99] |
| QTC Calculation(Bazett)        | 441.30 [441.15-441.46] | 442.15 [440.45-443.85] |
| Atrial Rate                    | 79.56 [79.38-79.74]    | 84.02 [82.42-85.62]    |
| P-R Interval                   | 153.11 [152.96-153.26] | 152.71 [151.74-153.67] |
| P Axis                         | 51.68 [51.57-51.79]    | 51.34 [50.55-52.14]    |
| TSH                            | 2.05 [2.02-2.08]       | 2.19 [2.07-2.30]       |
| UA pH                          | 6.01 [6.01-6.01]       | 6.05 [6.02-6.08]       |
| UA Specific Gravity            | 1.17 [1.02-1.33]       | 1.02 [1.02-1.02]       |
| eGFR, AA                       | 55.86 [55.74-55.98]    | 54.44 [53.75-55.13]    |
| LACTIC ACID                    | 1.11 [1.10-1.11]       | 1.15 [1.13-1.17]       |
| IMMUNOGLOBULIN G               | 862.30 [859.53-865.06] | 876.27 [854.87-897.67] |

|                          |                        |                        |
|--------------------------|------------------------|------------------------|
| % Myelocytes             | 1.07 [1.06-1.08]       | 1.28 [1.20-1.36]       |
| IMMUNOGLOBULIN M         | 51.22 [49.79-52.64]    | 46.45 [45.20-47.70]    |
| FERRITIN                 | 200.41 [196.32-204.49] | 369.52 [305.59-433.46] |
| IMMUNOGLOBULINS A        | 96.27 [95.09-97.44]    | 117.54 [97.39-137.69]  |
| RBC                      | 4.00 [4.00-4.00]       | 3.92 [3.90-3.95]       |
| WBC                      | 6.41 [6.38-6.44]       | 6.69 [6.50-6.88]       |
| Triglycerides            | 114.15 [113.75-114.55] | 116.17 [114.00-118.35] |
| CARCINOEMBRYONIC ANTIGEN | 6.26 [5.52-7.01]       | 57.65 [16.77-98.53]    |
| BUN                      | 16.20 [16.16-16.24]    | 17.37 [16.87-17.86]    |
| Albumin Fraction         | 3.90 [3.90-3.90]       | 3.87 [3.86-3.88]       |
| FIBRINOGEN               | 371.21 [370.94-371.48] | 373.57 [370.19-376.96] |
| RETICULOCYTE COUNT       | 2.23 [2.22-2.24]       | 2.25 [2.21-2.29]       |
| Abs Retic                | 74.50 [74.31-74.69]    | 73.95 [73.17-74.72]    |
| Total Cholesterol        | 171.57 [171.39-171.76] | 170.57 [169.48-171.65] |
| Alpha2-Globulin Frac     | 0.80 [0.80-0.80]       | 0.80 [0.80-0.80]       |
| Beta-Globulin Fracti     | 0.71 [0.71-0.71]       | 0.72 [0.70-0.73]       |
| Gamma-Globulin Fract     | 0.91 [0.91-0.91]       | 0.91 [0.90-0.92]       |
| Alpha1-Globulin Frac     | 0.30 [0.30-0.30]       | 0.31 [0.30-0.31]       |
| pCO2 Art                 | 39.01 [39.00-39.02]    | 38.97 [38.86-39.07]    |
| TACROLIMUS (FK506)       | 5.70 [5.70-5.71]       | 5.72 [5.68-5.76]       |

**Footnote:** All laboratory values are the last value documented prior to the unique encounter for each patient

**eTable 6.** Variable Importance by Model, Top 20 Predictors

|                                               |
|-----------------------------------------------|
| <b>Logistic Regression</b>                    |
| Albumin: last                                 |
| Solid tumor: recent count                     |
| Metastatic cancer: recent count               |
| Patient age                                   |
| Alkaline phosphatase: last                    |
| Gender                                        |
| Solid tumor: total count                      |
| Blood loss anemia: total count                |
| Red blood cells: last                         |
| MCHC: last                                    |
| BUN: last                                     |
| Fluid and electrolyte disorders: recent count |
| Other neurological disorders: recent count    |
| Blood loss anemia: recent count               |
| Lymphoma: recent count                        |
| Calcium: last                                 |
| Drug abuse: total count                       |
| Q-T interval: last                            |
| Pulmonary circulation disorders: recent       |
| Weight loss: recent                           |
| <b>Random Forest</b>                          |
| Metastatic cancer: recent count               |
| Albumin: last                                 |
| Alkaline phosphatase: last                    |
| Albumin: minimum                              |
| Patient age                                   |
| Alkaline phosphatase: maximum                 |
| Solid tumor: total count                      |
| Solid tumor: recent count                     |
| Metastatic cancer: total count                |
| % lymphocytes: minimum                        |
| % lymphocytes: last                           |

|                                          |
|------------------------------------------|
| RDW: maximum                             |
| % neutrophils: last                      |
| Alkaline phosphatase: standard deviation |
| Magnesium: count                         |
| Magnesium: standard deviation            |
| RDW: last                                |
| MCV: count                               |
| AST: last                                |
| RDW: standard deviation                  |
| <b>Gradient Boosting</b>                 |
| Albumin: last                            |
| Solid tumor: recent count                |
| Metastatic cancer: total count           |
| Metastatic cancer: recent count          |
| Alkaline phosphatase: last               |
| % lymphocytes: last                      |
| % neutrophils: last                      |
| Albumin: minimum                         |
| Alkaline phosphatase: maximum            |
| % lymphocytes: minimum                   |
| RDW: last                                |
| Patient age                              |
| MCV: standard deviation                  |
| % neutrophils: maximum                   |
| Solid tumor: total count                 |
| Albumin: maximum                         |
| % lymphocytes manual: minimum            |
| Sodium: minimum                          |
| ALT: count                               |
| Alkaline phosphatase: standard deviation |
